# Supplementary material for: Consistent Conjectural Variations Equilibrium in the Semi-Mixed Oligopoly
Source: Hindawi journal article supplement (doi:10.1155/2021/9997740), 2021-06-18
Supplement: f1 [file 9997740.f1.pdf]

## Appendix A. Proof of Lemma 1

**Lemma 1.** *Let assumptions **A1** and **A2** be true. If the vector  $(p, q_0, q_1, \dots, q_n)$  is the equilibrium exterior for the given influence coefficients  $(\nu_0, \nu_1, \dots, \nu_n)$  then the relation  $p > p_0$  is equivalent to the fact that all production volumes are positive, i.e.,  $q_i > 0 \forall i \in \{0, 1, \dots, n\}$ .*

**Proof:** Let  $(p, q_0, q_1, \dots, q_n)$  be an exterior equilibrium.

Assume that  $q_i > 0 \forall i \in \{0, 1, \dots, n\}$ , then, from the optimality condition (10) and the assumption **A2** we have

$$p = \nu_i q_i + f'_i(q_i) \geq f'_i(q_i) > f'_i(0), \quad \forall i \in \{1, \dots, n\}, \quad (\text{A.1})$$

from which we get  $p > \max_{i \in \{1, \dots, n\}} \{f'_i(0)\} = p_0$ .

On the other hand, if  $p > p_0$ , we get from assumption **A2** that

$$f'_i(0) \leq \max_{i \in \{1, \dots, n\}} \{f'_i(0)\} = p_0, \quad \forall i \in \{1, \dots, n\}, \quad (\text{A.2})$$

and

$$-\beta \left( \sum_{i=1}^n q_i \right) \nu_0 + f'_0(0) \leq f'_0(0) \leq \max_{i \in \{1, \dots, n\}} \{f'_i(0)\} = p_0, \quad (\text{A.3})$$

which implies that inequalities

$$p \leq f'_i(0), \quad i \in \{1, \dots, n\}, \quad (\text{A.4})$$

and

$$p \leq -\beta \left( \sum_{i=1}^n q_i \right) \nu_0 + f'_0(0), \quad (\text{A.5})$$

from the optimality condition (10) and (12), are impossible, thus, it must hold that  $q_i > 0 \forall i \in \{1, \dots, n\}$ , and  $q_0 > 0$  ■

## Appendix B. Proof of Theorem 1

**Theorem 1.** *Under assumptions **A1**, **A2** and **A3**, for any  $\beta \in (0, 1]$ ,  $D \geq 0$ ,  $\nu_i \geq 0$ ,  $i \in \{1, \dots, n\}$ , and  $\nu_0 \in [0, \bar{\nu}_0]$ , there exists uniquely the exterior*

equilibrium  $(p, q_0, q_1, \dots, q_n)$ , which is continuously differentiable with respect to the parameters  $\beta$ ,  $D$  and  $\nu_i$ ,  $i \in \{0, 1, \dots, n\}$ . Moreover,  $p > p_0$  and

$$\frac{\partial p}{\partial D} = \frac{1}{\frac{1}{(1-\beta)\nu_0 + f_0''(q_0)} + \frac{\nu_0 + f_0''(q_0)}{(1-\beta)\nu_0 + f_0''(q_0)} \sum_{i=1}^n \frac{1}{\nu_i + f_i''(q_i)} - G'(p)}. \quad (17)$$

**Proof:** Since we are looking for an exterior equilibrium with  $q_i > 0$ ,  $\forall i \in \{1, \dots, n\}$ , from the optimality conditions (10), we can consider the equality

$$\varphi_i(p, q_i, \nu_i) = p - [\nu_i q_i + f_i'(q_i)] = 0, \quad \forall i \in \{1, \dots, n\}, \quad (B.1)$$

where, from the assumption **A2**,  $\varphi_i$  is continuously differentiable with respect to  $(p, q_i, \nu_i)$ .

Therefore, for all  $\nu_i \geq 0$ ,  $i \in \{1, \dots, n\}$ , we have that the function

$$g_i(q_i) = \nu_i q_i + f_i'(q_i), \quad (B.2)$$

is continuously differentiable and strictly increasing for all  $q_i \geq 0$  (by the assumption **A2**). In addition,

$$g_i(0) = f_i'(0) \leq p_0 = f_i'(q_i^0) \leq g_i(q_i^0), \quad (B.3)$$

and there exists the limit (which can be either, finite or infinite)

$$p_i^1(\nu_i) := \lim_{q_i \rightarrow +\infty} g_i(q_i) = \lim_{q_i \rightarrow +\infty} [\nu_i q_i + f_i'(q_i)] > p_0. \quad (B.4)$$

Therefore, for each  $p \in [p_0, p_i^1(\nu_i))$ , there exists a unique  $q_i \geq 0$  such that  $\varphi_i(p, q_i, \nu_i) = 0$ .

Moreover, since

$$\frac{\partial \varphi_i}{\partial q_i} = -\nu_i - f_i''(q_i) < 0, \quad \forall q_i, \nu_i \geq 0, p \in [p_0, p_i^1(\nu_i)), \quad (B.5)$$

by the implicit function theorem, the mapping

$$q_i(p, \nu_i) := \{q_i \geq 0 \mid \varphi_i(p, q_i, \nu_i) = 0\}, \quad (B.6)$$

is a continuously differentiable function with respect to  $\nu_i \geq 0$  and  $p \in [p_0, p_i^1(\nu_i))$ , with the relationships

$$\frac{\partial q_i}{\partial p} = -\frac{\frac{\partial \varphi_i}{\partial p}}{\frac{\partial \varphi_i}{\partial q_i}} = \frac{1}{\nu_i + f_i''(q_i)} > 0 \quad (B.7)$$

and

$$\frac{\partial q_i}{\partial \nu_i} = -\frac{\frac{\partial \varphi_i}{\partial \nu_i}}{\frac{\partial \varphi_i}{\partial q_i}} = -\frac{q_i}{\nu_i + f_i''(q_i)} \leq 0, \quad (\text{B.8})$$

which means that  $q_i(p, \nu_i)$  is strictly increasing with respect to  $p \in [p_0, p_i^1(\nu_i))$  (which implies that  $q_i(p, \nu_i) > 0$  if  $p > p_0$ ) and decreasing with respect to  $\nu_i \geq 0$ . Moreover, from (B.1) and (B.4) we can see that

$$q_i(p_0, \nu_i) \leq q_i(p_0, 0) = q_i^0 \quad (\text{B.9})$$

and

$$\lim_{p \uparrow p_i^1(\nu_i)} q_i(p, \nu_i) = +\infty. \quad (\text{B.10})$$

Next, from the optimality conditions (12), we can consider the equation

$$\begin{aligned} \varphi_0(p, q_0, \beta, \nu_0, \nu_1, \dots, \nu_n) &= \left[ p + \beta \nu_0 \sum_{i=1}^n q_i(p, \nu_i) \right] \\ &- [(1 - \beta)\nu_0 q_0 + f_0'(q_0)] = 0, \end{aligned} \quad (\text{B.11})$$

where, from the above arguments and the assumption **A2**,  $\varphi_0(p, q_0, \beta, \nu_0, \nu_1, \dots, \nu_n)$  is continuously differentiable with respect to  $(p, q_0, \beta, \nu_0, \nu_1, \dots, \nu_n)$ .

Now, consider an arbitrary  $\nu_i \geq 0$ ,  $\forall i \in \{1, \dots, n\}$ . If we consider  $\nu_0 > 0$ , then, by the assumption **A2**, the following inequalities hold

$$\left[ p_0 + \beta \nu_0 \sum_{i=1}^n q_i(p_0, \nu_i) \right] \geq p_0 \geq f_0'(0) = [(1 - \beta)\nu_0(0) + f_0'(0)], \quad (\text{B.12})$$

and we can define

$$p^1(\nu_1, \dots, \nu_n) := \min_{i \in \{1, \dots, n\}} \{p_i^1(\nu_i)\}. \quad (\text{B.13})$$

Now we are going to show that there exists a value  $p_0^1(\beta, \nu_0, \nu_1, \dots, \nu_n) > p_0$ , finite or infinite, but not exceeding  $p^1(\nu_1, \dots, \nu_n)$ , such that

$$\lim_{p \uparrow p_0^1(\beta, \nu_0, \nu_1, \dots, \nu_n)} \left[ p + \beta \nu_0 \sum_{i=1}^n q_i(p, \nu_i) \right] = \lim_{q_0 \rightarrow +\infty} [(1 - \beta)\nu_0 q_0 + f_0'(q_0)]. \quad (\text{B.14})$$

The proof is divided into two cases:  $\beta = 1$  and  $\beta \in (0, 1)$ .

First, we can observe that the function  $p + \beta\nu_0 \sum_{i=1}^n q_i(p, \nu_i)$  is continuous and strictly increasing (as shown above) with respect to  $p \in [p_0, p^1(\nu_1, \dots, \nu_n)]$ , and the function  $(1 - \beta)\nu_0 q_0 + f'_0(q_0)$  is continuous and strictly increasing (by the assumption **A2**) with respect to  $q_0 \geq 0$ .

**Case 1:** Let  $\beta = 1$ . Under these conditions, the equality (B.14) is rewritten as

$$\lim_{p \uparrow p_0^1(\beta, \nu_0, \nu_1, \dots, \nu_n)} \left[ p + \nu_0 \sum_{i=1}^n q_i(p, \nu_i) \right] = \lim_{q_0 \rightarrow +\infty} f'_0(q_0). \quad (\text{B.15})$$

If  $\sum_{i=1}^n q_i^0 > 0$ , from (16) we have that

$$\nu_0 < \frac{f'_0(G(p_0) - \sum_{i=1}^n q_i^0) - p_0}{\sum_{i=1}^n q_i^0}, \quad (\text{B.16})$$

which implies the chain of inequalities

$$\begin{aligned} p_0 + \nu_0 \sum_{i=1}^n q_i(p_0, \nu_i) &\leq p_0 + \nu_0 \sum_{i=1}^n q_i^0 \\ &< p_0 + \frac{f'_0(G(p_0) - \sum_{i=1}^n q_i^0) - p_0}{\sum_{i=1}^n q_i^0} \sum_{i=1}^n q_i^0 = f'_0(G(p_0) - \sum_{i=1}^n q_i^0) \\ &< \lim_{q_0 \rightarrow +\infty} f'_0(q_0) \leq +\infty = \lim_{p \uparrow p^1(\nu_1, \dots, \nu_n)} \left[ p + \nu_0 \sum_{i=1}^n q_i(p, \nu_i) \right], \end{aligned} \quad (\text{B.17})$$

which guarantees the existence of the desired value of  $p_0^1(\beta, \nu_0, \nu_1, \dots, \nu_n)$  previously mentioned.

Otherwise, if  $\sum_{i=1}^n q_i^0 = 0$ , then, evidently

$$\begin{aligned} p_0 + \nu_0 \sum_{i=1}^n q_i(p_0, \nu_i) &\leq p_0 + \nu_0 \sum_{i=1}^n q_i^0 = p_0 < \lim_{q_0 \rightarrow +\infty} f'_0(q_0) \\ &\leq +\infty = \lim_{p \uparrow p^1(\nu_1, \dots, \nu_n)} \left[ p + \nu_0 \sum_{i=1}^n q_i(p, \nu_i) \right], \end{aligned} \quad (\text{B.18})$$

which again guarantees the existence of the desired value  $p_0^1(\beta, \nu_0, \nu_1, \dots, \nu_n)$  mentioned above.



**Case 2:** Now let  $\beta \in (0, 1)$ . In this case

$$\lim_{p \uparrow p^1(\nu_1, \dots, \nu_n)} \left[ p + \beta \nu_0 \sum_{i=1}^n q_i(p, \nu_i) \right] = \lim_{q_0 \rightarrow +\infty} [(1 - \beta)\nu_0 q_0 + f'_0(q_0)] = +\infty, \quad (\text{B.19})$$

which implies that  $p_0^1(\beta, \nu_0, \nu_1, \dots, \nu_n) = p^1(\nu_1, \dots, \nu_n)$ .

Thus, the proof of the existence of the value  $p_0^1(\beta, \nu_0, \nu_1, \dots, \nu_n)$  mentioned above is completed.

Therefore, from relationships (B.12) and (B.14), we can conclude that for every  $p \in [p_0, p_0^1(\beta, \nu_0, \nu_1, \dots, \nu_n))$  there exists a unique  $q_0 \geq 0$  such that  $\varphi_0(p, q_0, \beta, \nu_0, \nu_1, \dots, \nu_n) = 0$ .

On the other hand if  $\nu_0 = 0$ , then, the equation  $\varphi_0(p, q_0, \beta, \nu_0, \nu_1, \dots, \nu_n) = 0$  takes the form

$$p - f'_0(q_0) = 0. \quad (\text{B.20})$$

So we can define the value

$$p_0^1(\beta, \nu_0, \nu_1, \dots, \nu_n) = \lim_{q_0 \rightarrow +\infty} f'_0(q_0), \quad (\text{B.21})$$

and by the assumption **A2**, we can guarantee that for all  $p \in [p_0, p_0^1(\beta, \nu_0, \nu_1, \dots, \nu_n))$  there exists a unique  $q_0 \geq 0$  such that  $\varphi_0(p, q_0, \beta, \nu_0, \nu_1, \dots, \nu_n) = 0$ .

Moreover, we have that

$$\frac{\partial \varphi_0}{\partial q_0} = -(1 - \beta)\nu_0 - f''_0(q_0) < 0, \quad (\text{B.22})$$

for all  $q_0, \nu_0, \nu_1, \dots, \nu_n \geq 0$ ,  $p \in [p_0, p_0^1(\beta, \nu_0, \nu_1, \dots, \nu_n))$ .

Then, by the implicit function theorem, the mapping

$$q_0(p, \beta, \nu_0, \nu_1, \dots, \nu_n) := \{q_0 \geq 0 \mid \varphi_0(p, q_0, \beta, \nu_0, \nu_1, \dots, \nu_n) = 0\} \quad (\text{B.23})$$

is a continuously differentiable function with respect to  $\beta \in (0, 1]$ ,  $\nu_0, \nu_1, \dots, \nu_n \geq 0$ , and  $p \in [p_0, p_0^1(\beta, \nu_0, \nu_1, \dots, \nu_n))$ , with the following properties

$$\frac{\partial q_0}{\partial p} = -\frac{\frac{\partial \varphi_0}{\partial p}}{\frac{\partial \varphi_0}{\partial q_0}} = \frac{1 + \beta \nu_0 \sum_{i=1}^n \frac{\partial q_i}{\partial p}}{(1 - \beta)\nu_0 + f''_0(q_0)} = \frac{1 + \beta \nu_0 \sum_{i=1}^n \frac{1}{\nu_i + f''_i(q_i)}}{(1 - \beta)\nu_0 + f''_0(q_0)} > 0, \quad (\text{B.24})$$

$$\frac{\partial q_0}{\partial \nu_i} = -\frac{\frac{\partial \varphi_0}{\partial \nu_i}}{\frac{\partial \varphi_0}{\partial q_0}} = \frac{\beta \nu_0 \frac{\partial q_i}{\partial \nu_i}}{(1-\beta)\nu_0 + f_0''(q_0)} = -\frac{\beta \nu_0 \frac{q_i}{\nu_i + f_i''(q_i)}}{(1-\beta)\nu_0 + f_0''(q_0)} \leq 0, \quad (\text{B.25})$$

for all  $i \in \{1, \dots, n\}$ , and

$$\frac{\partial q_0}{\partial \nu_0} = -\frac{\frac{\partial \varphi_0}{\partial \nu_0}}{\frac{\partial \varphi_0}{\partial q_0}} = \frac{\beta \sum_{i=1}^n q_i(p, \nu_i) - (1-\beta)q_0}{(1-\beta)\nu_0 + f_0''(q_0)}, \quad (\text{B.26})$$

which allow us to conclude that  $q_0(p, \beta, \nu_0, \nu_1, \dots, \nu_n)$  is strictly increasing with respect to  $p \in [p_0, p_0^1(\beta, \nu_0, \nu_1, \dots, \nu_n))$  (which implies that  $q_0(p, \beta, \nu_0, \nu_1, \dots, \nu_n) > 0$  if  $p > p_0$ ) and decreasing with respect to  $\nu_i \geq 0, \forall i \in \{1, \dots, n\}$ . In addition, from the relationships (B.11), (B.14) and (B.21), it is easy to see that

$$q_0(p_0, \beta, 0, \nu_1, \dots, \nu_n) = q_0^0 \quad (\text{B.27})$$

and

$$\lim_{p \uparrow p_0^1(\beta, \nu_0, \nu_1, \dots, \nu_n)} q_0(p, \beta, \nu_0, \nu_1, \dots, \nu_n) = +\infty. \quad (\text{B.28})$$

Now let  $\beta \in (0, 1], \nu_1, \dots, \nu_n, D \geq 0$ , and consider the equation

$$\begin{aligned} \Gamma(p, \beta, \nu_0, \nu_1, \dots, \nu_n, D) &= \left[ q_0(p, \beta, \nu_0, \nu_1, \dots, \nu_n) + \sum_{i=1}^n q_i(p, \nu_i) \right] \\ &\quad - [G(p) + D] = 0, \end{aligned} \quad (\text{B.29})$$

which, by (B.1)-(B.28) and the assumption **A1**, is continuously differentiable with respect to all  $\beta \in (0, 1], \nu_i \geq 0, \forall i \in \{1, \dots, n\}, D \geq 0$  and  $p \in [p_0, p_0^1(\beta, \nu_0, \nu_1, \dots, \nu_n))$ .

Moreover, by (B.1)-(B.28), the function  $q_0(p, \beta, \nu_0, \nu_1, \dots, \nu_n) + \sum_{i=1}^n q_i(p, \nu_i)$  is continuously differentiable and strictly increasing with respect to all  $p \in [p_0, p_0^1(\beta, \nu_0, \nu_1, \dots, \nu_n))$ , and the following relationship holds

$$\lim_{p \uparrow p_0^1(\beta, \nu_0, \nu_1, \dots, \nu_n)} \left[ q_0(p, \beta, \nu_0, \nu_1, \dots, \nu_n) + \sum_{i=1}^n q_i(p, \nu_i) \right] = +\infty. \quad (\text{B.30})$$

In addition, by **A1**, the function  $G(p)$  is continuously differentiable and strictly decreasing for all  $p > 0$ .

Then, by (B.1)-(B.28) and the assumption **A3**, we have that

$$\begin{aligned}
0 &\leq q_0(p_0, \beta, \nu_0, \nu_1, \dots, \nu_n) + \sum_{i=1}^n q_i(p_0, \nu_i) \\
&\leq q_0(p_0, \beta, \nu_0, 0, \dots, 0) + \sum_{i=1}^n q_i(p_0, 0) \\
&= q_0(p_0, \beta, \nu_0, 0, \dots, 0) + \sum_{i=1}^n q_i^0.
\end{aligned} \tag{B.31}$$

Now, we are going to analyze the sign of the derivative

$$\frac{\partial q_0}{\partial \nu_0}(p_0, \beta, \nu_0, 0, \dots, 0) = \frac{\beta \sum_{i=1}^n q_i^0 - (1 - \beta)q_0(p_0, \beta, \nu_0, 0, \dots, 0)}{(1 - \beta)\nu_0 + f_0''(q_0)}. \tag{B.32}$$

This analysis is done separately for the Cases A, B, C, D and E.

**Case A:** Let  $\beta = 1$  and  $\sum_{i=1}^n q_i^0 = 0$ . In this case, it is clear that

$$\frac{\partial q_0}{\partial \nu_0}(p_0, \beta, \nu_0, 0, \dots, 0) = 0, \quad \forall \nu_0 \geq 0, \tag{B.33}$$

thus,  $q_0(p_0, \beta, \nu_0, 0, \dots, 0)$  is constant with respect to  $\nu_0$  and

$$\begin{aligned}
q_0(p_0, \beta, \nu_0, 0, \dots, 0) + \sum_{i=1}^n q_i^0 &= q_0(p_0, \beta, 0, 0, \dots, 0) + \sum_{i=1}^n q_i^0 \\
&= \sum_{i=0}^n q_i^0 < G(p_0) \leq G(p_0) + D.
\end{aligned} \tag{B.34}$$

**Case B:** Let  $\beta = 1$  and  $\sum_{i=1}^n q_i^0 > 0$ . In this case, we have that

$$\frac{\partial q_0}{\partial \nu_0}(p_0, \beta, \nu_0, 0, \dots, 0) = \frac{\sum_{i=1}^n q_i^0}{f_0''(q_0)} > 0, \quad \forall \nu_0 \geq 0, \tag{B.35}$$

hence,  $q_0(p_0, \beta, \nu_0, 0, \dots, 0)$  is strictly increasing with respect to  $\nu_0$ .

In addition, from (16) we have that

$$\nu_0 < \frac{f_0'(G(p_0) - \sum_{i=1}^n q_i^0) - p_0}{\sum_{i=1}^n q_i^0}, \tag{B.36}$$

from which one has the inequality

$$q_0(p_0, \beta, \nu_0, 0, \dots, 0) < q_0 \left( p_0, \beta, \frac{f'_0(G(p_0) - \sum_{i=1}^n q_i^0) - p_0}{\sum_{i=1}^n q_i^0}, 0, \dots, 0 \right), \quad (\text{B.37})$$

and from the relationship (B.11) one can see that

$$q_0 \left( p_0, \beta, \frac{f'_0(G(p_0) - \sum_{i=1}^n q_i^0) - p_0}{\sum_{i=1}^n q_i^0}, 0, \dots, 0 \right) = G(p_0) - \sum_{i=1}^n q_i^0. \quad (\text{B.38})$$

Therefore,

$$\begin{aligned} & q_0(p_0, \beta, \nu_0, 0, \dots, 0) + \sum_{i=1}^n q_i^0 \\ & < q_0 \left( p_0, \beta, \frac{f'_0(G(p_0) - \sum_{i=1}^n q_i^0) - p_0}{\sum_{i=1}^n q_i^0}, 0, \dots, 0 \right) + \sum_{i=1}^n q_i^0 \\ & = G(p_0) - \sum_{i=1}^n q_i^0 + \sum_{i=1}^n q_i^0 = G(p_0) \leq G(p_0) + D. \end{aligned} \quad (\text{B.39})$$

**Case C:** Let  $\beta \in (0, 1)$  and  $\sum_{i=1}^n q_i^0 > \max \left\{ (1 - \beta)G(p_0), \frac{1 - \beta}{\beta} q_0^0 \right\}$ . For this case, we have the relationship:

$$\sum_{i=1}^n q_i^0 > \frac{1 - \beta}{\beta} q_0^0, \quad (\text{B.40})$$

which is equivalent to

$$\frac{\beta}{1 - \beta} \sum_{i=1}^n q_i^0 > q_0^0. \quad (\text{B.41})$$

Now, suppose that there exists the value  $\nu_0$  such that

$$\beta \sum_{i=1}^n q_i^0 - (1 - \beta)q_0(p_0, \beta, \nu_0, 0, \dots, 0) \leq 0, \quad (\text{B.42})$$

the latter inequality implies that

$$q_0(p_0, \beta, \nu_0, 0, \dots, 0) \geq \frac{\beta}{1 - \beta} \sum_{i=1}^n q_i^0. \quad (\text{B.43})$$

From the equation (B.11) we have that

$$p_0 = (1 - \beta)\nu_0 \left[ q_0(p_0, \beta, \nu_0, 0, \dots, 0) - \frac{\beta}{1 - \beta} \sum_{i=1}^n q_i^0 \right] + f'_0(q_0(p_0, \beta, \nu_0, 0, \dots, 0)), \quad (\text{B.44})$$

and applying the inequalities (B.41) and (B.43) to (B.44) yields the following relationship

$$\begin{aligned} p_0 &\geq (1 - \beta)\nu_0 \left[ \frac{\beta}{1 - \beta} \sum_{i=1}^n q_i^0 - \frac{\beta}{1 - \beta} \sum_{i=1}^n q_i^0 \right] + f'_0 \left( \frac{\beta}{1 - \beta} \sum_{i=1}^n q_i^0 \right) \\ &= f'_0 \left( \frac{\beta}{1 - \beta} \sum_{i=1}^n q_i^0 \right) > f'_0(q_0^0) = p_0, \end{aligned} \quad (\text{B.45})$$

which cannot be valid.

Thus, the assumption (B.42) cannot hold, which implies that

$$\beta \sum_{i=1}^n q_i^0 - (1 - \beta)q_0(p_0, \beta, \nu_0, 0, \dots, 0) > 0, \quad \forall \nu_0 \in [0, \bar{\nu}_0), \quad (\text{B.46})$$

therefore,

$$\frac{\partial q_0}{\partial \nu_0}(p_0, \beta, \nu_0, 0, \dots, 0) = \frac{\beta \sum_{i=1}^n q_i^0 - (1 - \beta)q_0(p_0, \beta, \nu_0, 0, \dots, 0)}{(1 - \beta)\nu_0 + f''_0(q_0)} > 0, \quad (\text{B.47})$$

for all  $\nu_0 \in [0, \bar{\nu}_0)$ , so the function  $q_0(p_0, \beta, \nu_0, 0, \dots, 0)$  is strictly increasing with respect to  $\nu_0 \in [0, \bar{\nu}_0)$ .

In addition, for this case we have

$$\bar{\nu}_0 = \frac{f'_0(G(p_0) - \sum_{i=1}^n q_i^0) - p_0}{\sum_{i=1}^n q_i^0 - (1 - \beta)G(p_0)} \quad (\text{B.48})$$

where  $G(p_0) - \sum_{i=1}^n q_i^0 > 0$  by **A3**, and  $\sum_{i=1}^n q_i^0 - (1 - \beta)G(p_0) > 0$  is one of the assumptions for this **Case C**. Moreover, from equation (B.11) we have that

$$q_0(p_0, \beta, \bar{\nu}_0, 0, \dots, 0) = G(p_0) - \sum_{i=1}^n q_i^0. \quad (\text{B.49})$$

Hence,

$$\begin{aligned} q_0(p_0, \beta, \nu_0, 0, \dots, 0) + \sum_{i=1}^n q_i^0 &< q_0(p_0, \beta, \bar{\nu}_0, 0, \dots, 0) + \sum_{i=1}^n q_i^0 \\ &= G(p_0) - \sum_{i=1}^n q_i^0 + \sum_{i=1}^n q_i^0 = G(p_0) \leq G(p_0) + D. \end{aligned} \quad (\text{B.50})$$

**Case D:** Let  $\beta \in (0, 1)$  and  $\sum_{i=1}^n q_i^0 \leq \frac{1-\beta}{\beta} q_0^0$ . Then,

$$\frac{\beta}{1-\beta} \sum_{i=1}^n q_i^0 \leq q_0^0. \quad (\text{B.51})$$

Now, suppose that there exists the value  $\nu_0$  such that

$$\beta \sum_{i=1}^n q_i^0 - (1-\beta)q_0(p_0, \beta, \nu_0, 0, \dots, 0) > 0, \quad (\text{B.52})$$

the latter inequality implies that

$$q_0(p_0, \beta, \nu_0, 0, \dots, 0) < \frac{\beta}{1-\beta} \sum_{i=1}^n q_i^0. \quad (\text{B.53})$$

Applying the inequalities (B.51) and (B.53) to (B.44) yields the following relationship

$$\begin{aligned} p_0 &< (1-\beta)\nu_0 \left[ \frac{\beta}{1-\beta} \sum_{i=1}^n q_i^0 - \frac{\beta}{1-\beta} \sum_{i=1}^n q_i^0 \right] + f_0' \left( \frac{\beta}{1-\beta} \sum_{i=1}^n q_i^0 \right) \\ &= f_0' \left( \frac{\beta}{1-\beta} \sum_{i=1}^n q_i^0 \right) \leq f_0'(q_0^0) = p_0, \end{aligned} \quad (\text{B.54})$$

which cannot be valid.

Thus, the assumption (B.52) cannot hold, which implies that

$$\beta \sum_{i=1}^n q_i^0 - (1-\beta)q_0(p_0, \beta, \nu_0, 0, \dots, 0) \leq 0, \quad \forall \nu_0 \in [0, \bar{\nu}_0), \quad (\text{B.55})$$

therefore,

$$\frac{\partial q_0}{\partial \nu_0}(p_0, \beta, \nu_0, 0, \dots, 0) = \frac{\beta \sum_{i=1}^n q_i^0 - (1-\beta)q_0(p_0, \beta, \nu_0, 0, \dots, 0)}{(1-\beta)\nu_0 + f_0''(q_0)} \leq 0, \quad (\text{B.56})$$

for all  $\nu_0 \in [0, \bar{\nu}_0)$ , so the function  $q_0(p_0, \beta, \nu_0, 0, \dots, 0)$  is decreasing with respect to  $\nu_0 \in [0, \bar{\nu}_0)$ .

Hence,

$$\begin{aligned} q_0(p_0, \beta, \nu_0, 0, \dots, 0) + \sum_{i=1}^n q_i^0 &\leq q_0(p_0, \beta, 0, 0, \dots, 0) + \sum_{i=1}^n q_i^0 \\ &= q_0^0 + \sum_{i=1}^n q_i^0 = \sum_{i=0}^n q_i^0 < G(p_0) \leq G(p_0) + D. \end{aligned} \quad (\text{B.57})$$

**Case E:** Let  $\beta \in (0, 1)$  and  $\frac{1-\beta}{\beta}q_0^0 < \sum_{i=1}^n q_i^0 \leq (1-\beta)G(p_0)$ . Analogous to **Case C**, using the inequality  $\sum_{i=1}^n q_i^0 > \frac{1-\beta}{\beta}q_0^0$ , we can show that that  $q_0(p_0, \beta, \nu_0, 0, \dots, 0)$  is strictly increasing with respect to  $\nu_0 \geq 0$ .

Now, from equation (B.11) we have that

$$\begin{aligned} &[p_0 - f'_0(q_0(p_0, \beta, \nu_0, 0, \dots, 0))] \\ &+ \beta\nu_0 \left[ \sum_{i=1}^n q_i^0 - \frac{1-\beta}{\beta}q_0(p_0, \beta, \nu_0, 0, \dots, 0) \right] = 0. \end{aligned} \quad (\text{B.58})$$

In addition, if  $\nu_0 > 0$ , then,

$$\begin{aligned} p_0 - f'_0(q_0(p_0, \beta, \nu_0, 0, \dots, 0)) &< p_0 - f'_0(q_0(p_0, \beta, 0, 0, \dots, 0)) \\ &= p_0 - f'_0(q_0^0) = p_0 - p_0 = 0, \end{aligned} \quad (\text{B.59})$$

thus,

$$p_0 - f'_0(q_0(p_0, \beta, \nu_0, 0, \dots, 0)) < 0, \quad \forall \nu_0 > 0. \quad (\text{B.60})$$

Moreover, since  $\sum_{i=1}^n q_i^0 > \frac{1-\beta}{\beta}q_0^0$  and  $q_0(p_0, \beta, \nu_0, 0, \dots, 0)$  is strictly increasing with respect to  $\nu_0$ , for any  $\nu_0 > 0$  the inequality

$$\sum_{i=1}^n q_i^0 - \frac{1-\beta}{\beta}q_0(p_0, \beta, \nu_0, 0, \dots, 0) > 0 \quad (\text{B.61})$$

implies that

$$q_0^0 < q_0(p_0, \beta, \nu_0, 0, \dots, 0) < \frac{\beta}{1-\beta} \sum_{i=1}^n q_i^0. \quad (\text{B.62})$$

Hence, from (B.58), (B.60), (B.62) and the strictly increasing behavior of  $q_0(p_0, \beta, \nu_0, 0, \dots, 0)$  with respect to  $\nu_0$ , we can see that

$$\lim_{\nu_0 \rightarrow +\infty} q_0(p_0, \beta, \nu_0, 0, \dots, 0) = \frac{\beta}{1-\beta} \sum_{i=1}^n q_i^0. \quad (\text{B.63})$$

Therefore, we have that

$$q_0(p_0, \beta, \nu_0, 0, \dots, 0) + \sum_{i=1}^n q_i^0 < \frac{\beta}{1-\beta} \sum_{i=1}^n q_i^0 + \sum_{i=1}^n q_i^0 = \frac{1}{1-\beta} \sum_{i=1}^n q_i^0. \quad (\text{B.64})$$

Applying the condition  $\sum_{i=1}^n q_i^0 \leq (1-\beta)G(p_0)$  of this **Case E** to (B.64), we get

$$q_0(p_0, \beta, \nu_0, 0, \dots, 0) + \sum_{i=1}^n q_i^0 < \frac{1}{1-\beta} \sum_{i=1}^n q_i^0 \leq G(p_0) \leq G(p_0) + D. \quad (\text{B.65})$$

Thus, as it follows from the above Cases A, B, C, D and E, we have shown that

$$q_0(p_0, \beta, \nu_0, 0, \dots, 0) + \sum_{i=1}^n q_i^0 < G(p_0) + D, \quad \forall \beta \in (0, 1], \nu_0 \in [0, \bar{\nu}_0]. \quad (\text{B.66})$$

Finally, the latter inequality (B.66), together with (B.31), yield the following inequality

$$q_0(p_0, \beta, \nu_0, \nu_1, \dots, \nu_n) + \sum_{i=1}^n q_i(p_0, \nu_i) < G(p_0) + D \quad (\text{B.67})$$

for all  $\beta \in (0, 1]$ ,  $\nu_0 \in [0, \bar{\nu}_0]$  and  $\nu_1, \dots, \nu_n \geq 0$ .

Therefore, from the relationships (B.30), (B.67), the strictly increasing behavior of the continuous functions  $q_i$ ,  $\forall i \in \{0, 1, \dots, n\}$ , with respect to  $p$ , and the strictly decreasing behavior of the continuous function  $G(p)$  with respect to  $p$ , we can guarantee the existence of a unique price value  $p \in (p_0, p_0^1(\beta, \nu_0, \nu_1, \dots, \nu_n))$  that solves (B.29), i.e., such that

$$\Gamma(p, \beta, \nu_0, \nu_1, \dots, \nu_n, D) = 0. \quad (\text{B.68})$$

Moreover, from (B.29) we have that

$$\frac{\partial \Gamma}{\partial p} = \frac{\partial q_0}{\partial p} + \sum_{i=1}^n \frac{\partial q_i}{\partial p} - G'(p) > 0, \quad (\text{B.69})$$

for all  $\beta \in (0, 1]$ ,  $\nu_0 \in [0, \bar{\nu}_0]$ ,  $\nu_1, \dots, \nu_n, D \geq 0$  and  $p \in [p_0, p_0^1(\beta, \nu_0, \nu_1, \dots, \nu_n))$ .

Hence, by the implicit function theorem, the mapping

$$\begin{aligned} & p(\beta, \nu_0, \nu_1, \dots, \nu_n, D) \\ & := \{p \in [p_0, p_0^1(\beta, \nu_0, \nu_1, \dots, \nu_n)) \mid \Gamma(p, \beta, \nu_0, \nu_1, \dots, \nu_n, D) = 0\} \end{aligned} \quad (\text{B.70})$$



is a continuously differentiable function with respect to  $\beta \in (0, 1]$ ,  $\nu_0 \in [0, \bar{\nu}_0)$ ,  $\nu_i \geq 0, \forall i \in \{1, \dots, n\}$ , and  $D \geq 0$ , i.e., for all  $\beta \in (0, 1]$ ,  $\nu_0 \in [0, \bar{\nu}_0)$ ,  $\nu_i \geq 0, \forall i \in \{1, \dots, n\}$ , and  $D \geq 0$ , there exist unique values  $p = p(\beta, \nu_0, \nu_1, \dots, \nu_n, D) \in (p_0, p_0^1(\beta, \nu_0, \nu_1, \dots, \nu_n))$ ,  $q_0 = q_0(p(\beta, \nu_0, \nu_1, \dots, \nu_n, D), \nu_0, \nu_1, \dots, \nu_n) > 0$  and  $q_i = q_i(p(\beta, \nu_0, \nu_1, \dots, \nu_n, D), \nu_i) > 0, \forall i \in \{1, \dots, n\}$ , such that the vector  $(p, q_0, q_1, \dots, q_n)$  is the exterior equilibrium, with  $q_i > 0 \forall i \in \{0, 1, \dots, n\}$ , for the influence coefficients  $(\nu_0, \nu_1, \dots, \nu_n)$ . Moreover, if  $p \leq p_0$  there is no exterior equilibrium with  $q_i > 0 \forall i \in \{0, 1, \dots, n\}$ , and if  $p \geq p_0^1(\beta, \nu_0, \nu_1, \dots, \nu_n)$  then some of the optimality conditions (10) and/or (12) cannot hold, which implies that the vector  $(p, q_0, q_1, \dots, q_n)$  is the unique exterior equilibrium for the influence coefficients  $(\nu_0, \nu_1, \dots, \nu_n)$ .

Finally, for this value  $p = p(\beta, \nu_0, \nu_1, \dots, \nu_n, D)$ , taking into account the formulas (B.7), (B.24), (B.29), and (B.69), we can calculate

$$\frac{\partial p}{\partial D} = -\frac{\frac{\partial \Gamma}{\partial D}}{\frac{\partial \Gamma}{\partial p}} = \frac{1}{\frac{1}{(1-\beta)\nu_0 + f_0''(q_0)} + \frac{\nu_0 + f_0'(q_0)}{(1-\beta)\nu_0 + f_0''(q_0)} \sum_{i=1}^n \frac{1}{\nu_i + f_i''(q_i)} - G'(p)}. \quad (\text{B.71})$$

The proof of Theorem 1 is complete ■

## Appendix C. Proof of Theorem 2

**Theorem 2.** *Under assumptions A1, A2 and A3, there exists the interior equilibrium.*

**Proof:** Let us fix the values of  $\beta \in (0, 1]$  and  $D \geq 0$ . We are going to prove that there exists the interior equilibrium for any  $n \geq 1$ .

By Theorem 1, for any  $\nu_0 \in [0, \bar{\nu}_0)$  and  $\nu_i \geq 0, \forall i \in \{1, \dots, n\}$ , there exists a unique exterior equilibrium  $(p, q_0, q_1, \dots, q_n)$ , with  $p > p_0$  and  $q_i > 0, \forall i \in \{0, 1, \dots, n\}$ , and in addition, the functions  $p = p(\nu_0, \nu_1, \dots, \nu_n)$ ,  $q_0 = q_0(\nu_0, \nu_1, \dots, \nu_n)$ , and  $q_i = q_i(\nu_0, \nu_1, \dots, \nu_n), \forall i \in \{1, \dots, n\}$ , are continuously differentiable with respect to  $\nu_0 \in [0, \bar{\nu}_0)$  and  $\nu_i \geq 0, \forall i \in \{1, \dots, n\}$ .

Since  $p > p_0$  and  $G(p)$  is strictly decreasing, we have that

$$\sum_{i=0}^n q_i = G(p) + D < G(p_0) + D, \quad (\text{C.1})$$

then,  $q_i \in (0, G(p_0) + D)$ ,  $\forall i \in \{0, 1, \dots, n\}$ . Moreover,  $f_i''(q_i) \in (0, \alpha)$ ,  $\forall i \in \{0, 1, \dots, n\}$ , where  $\alpha = \max_{i \in \{0, 1, \dots, n\}} \{f_i''(G(p_0) + D)\} > 0$ .

Now, consider the functions

$$F_0(\nu_0, \nu_1, \dots, \nu_n) = \frac{1}{\sum_{i=1}^n \frac{1}{\nu_i + f_i''(q_i)} - G'(p)} > 0, \quad (\text{C.2})$$

$$F_i(\nu_0, \nu_1, \dots, \nu_n) = \frac{1}{\frac{1}{(1-\beta)\nu_0 + f_0''(q_0)} + \frac{\nu_0 + f_0''(q_0)}{(1-\beta)\nu_0 + f_0''(q_0)} \sum_{\substack{j=1 \\ j \neq i}}^n \frac{1}{\nu_j + f_j''(q_j)} - G'(p)} > 0, \quad (\text{C.3})$$

for all  $i \in \{1, \dots, n\}$ .

By assumptions **A1** and **A2**, these functions are continuous with respect to  $(\nu_0, \nu_1, \dots, \nu_n)$ .

Now let us define the constants

$$M_0 = \frac{2\alpha}{\beta + n - 1} > 0, \quad (\text{C.4})$$

$$M = \frac{[(1-\beta) + n]\alpha}{\beta + n - 1} > 0. \quad (\text{C.5})$$

If we select  $\nu_0 \in [0, M_0]$  and  $\nu_i \in [0, M]$ ,  $\forall i \in \{1, \dots, n\}$ , then,

$$\begin{aligned} F_0(\nu_0, \nu_1, \dots, \nu_n) &= \frac{1}{\sum_{i=1}^n \frac{1}{\nu_i + f_i''(q_i)} - G'(p)} < \frac{1}{\sum_{i=1}^n \frac{1}{M + \alpha}} = \frac{1}{\frac{n}{M + \alpha}} \\ &= \frac{M + \alpha}{n} = \frac{\frac{[(1-\beta) + n]\alpha}{\beta + n - 1} + \alpha}{n} = \frac{2\alpha}{\beta + n - 1} = M_0, \end{aligned} \quad (\text{C.6})$$

$$\begin{aligned} F_i(\nu_0, \nu_1, \dots, \nu_n) &= \frac{1}{\frac{1}{(1-\beta)\nu_0 + f_0''(q_0)} + \frac{\nu_0 + f_0''(q_0)}{(1-\beta)\nu_0 + f_0''(q_0)} \sum_{\substack{j=1 \\ j \neq i}}^n \frac{1}{\nu_j + f_j''(q_j)} - G'(p)} \\ &< \frac{1}{\frac{1}{(1-\beta)M_0 + \alpha}} = (1-\beta)M_0 + \alpha \\ &= (1-\beta)\frac{2\alpha}{\beta + n - 1} + \alpha = \frac{[(1-\beta) + n]\alpha}{\beta + n - 1} = M, \end{aligned} \quad (\text{C.7})$$

for all  $i \in \{1, \dots, n\}$ .

In other words  $F_0(\nu_0, \nu_1, \dots, \nu_n) \in [0, M_0]$  and  $F_i(\nu_0, \nu_1, \dots, \nu_n) \in [0, M]$ ,  $\forall i \in \{1, \dots, n\}$ , whenever  $\nu_0 \in [0, M_0]$  and  $\nu_i \in [0, M]$ ,  $\forall i \in \{1, \dots, n\}$ , which

means that the continuous function  $H = (F_0, F_1, \dots, F_n)$  maps the convex compact set  $[0, M_0] \times [0, M]^n$  into itself, therefore, by Brouwer's fixed-point theorem, the function  $H = (F_0, F_1, \dots, F_n)$  has a fixed point  $(\nu_0^*, \nu_1^*, \dots, \nu_n^*)$ , i.e., there exists  $(\nu_0^*, \nu_1^*, \dots, \nu_n^*) > 0$  such that

$$F_0(\nu_0^*, \nu_1^*, \dots, \nu_n^*) = \nu_0^*, \quad (\text{C.8})$$

$$F_i(\nu_0^*, \nu_1^*, \dots, \nu_n^*) = \nu_i^*, \quad \forall i \in \{1, \dots, n\}. \quad (\text{C.9})$$

Now, for these influence coefficients  $(\nu_0^*, \nu_1^*, \dots, \nu_n^*)$  we calculate their exterior equilibrium  $(p^*, q_0^*, q_1^*, \dots, q_n^*)$ , implying that

$$\nu_0^* = \frac{1}{\sum_{i=1}^n \frac{1}{\nu_i^* + f_i''(q_i^*)} - G'(p^*)}, \quad (\text{C.10})$$

$$\nu_i^* = \frac{1}{\frac{1}{(1-\beta)\nu_0^* + f_0''(q_0^*)} + \frac{\nu_0^* + f_0''(q_0^*)}{(1-\beta)\nu_0^* + f_0''(q_0^*)} \sum_{\substack{j=1 \\ j \neq i}}^n \frac{1}{\nu_j^* + f_j''(q_j^*)} - G'(p^*)}, \quad (\text{C.11})$$

for all  $i \in \{1, \dots, n\}$ .

Finally, the equations (C.10) and (C.11) imply that  $(p^*, q_0^*, q_1^*, \dots, q_n^*, \nu_0^*, \nu_1^*, \dots, \nu_n^*)$  is the interior equilibrium, which proves Theorem 2 ■

#### Appendix D. Proof of Theorem 3

**Theorem 3.** *Under assumptions A4, A5 and A6, for every  $\beta \in (0, 1]$  there exists uniquely the interior equilibrium  $(p^*, q_0^*, q^*, \nu_0^*, \nu^*)$ .*

**Proof:** For our particular case, the consistency criterion takes the following form:

$$\nu_0 = \frac{1}{\frac{n}{\nu + a} + K}, \quad (\text{D.1})$$

$$\nu = \frac{1}{\frac{1}{(1-\beta)\nu_0 + a_0} + \frac{\nu_0 + a_0}{(1-\beta)\nu_0 + a_0} \frac{n-1}{\nu + a} + K}, \quad (\text{D.2})$$

then, the functions (C.2) and (C.3), within the proof of Theorem 2, are rewritten as follows

$$F_0(\nu_0, \nu) = \frac{1}{\frac{n}{\nu + a} + K} > 0, \quad (\text{D.3})$$

$$F(\nu_0, \nu) = \frac{1}{\frac{1}{(1-\beta)\nu_0 + a_0} + \frac{\nu_0 + a_0}{(1-\beta)\nu_0 + a_0} \frac{n-1}{\nu + a} + K} > 0, \quad (\text{D.4})$$

We can see that the functions  $F_0$  and  $F$  are continuously differentiable with respect to  $\beta \in (0, 1]$  and  $\nu_0, \nu \geq 0$ , and by Theorem 2 we know that the function  $H = (F_0, F)$  has a fixed point, i.e., the system of equations

$$F_0(\nu_0, \nu) = \nu_0, \quad (\text{D.5})$$

$$F(\nu_0, \nu) = \nu, \quad (\text{D.6})$$

has a solution.

In order to prove that the solution of (D.5) and (D.6) is unique, we are going to show that the function  $H = (F_0, F)$  is a nonexpansive mapping.

Given that  $H$  is a continuously differentiable function, in order to prove that  $H$  is a nonexpansive mapping, it is enough to show that  $\|\nabla H\|_\infty < 1$  (i.e., the infinite norm of the Jacobian matrix of  $H$  is less than 1).

From the function (D.3) and (D.4) we have that

$$\frac{\partial F_0}{\partial \nu_0} = 0, \quad (\text{D.7})$$

$$\frac{\partial F_0}{\partial \nu} = \frac{n}{(\nu + a)^2 \left( \frac{n}{\nu + a} + K \right)^2} = \frac{n}{[n + (\nu + a)K]^2} > 0, \quad (\text{D.8})$$

$$\begin{aligned} \frac{\partial F}{\partial \nu_0} &= \frac{\frac{1-\beta}{[(1-\beta)\nu_0 + a_0]^2} - \frac{(1-\beta)\nu_0 + a_0 - (1-\beta)(\nu_0 + a_0)}{[(1-\beta)\nu_0 + a_0]^2} \frac{n-1}{\nu + a}}{\left[ \frac{1}{(1-\beta)\nu_0 + a_0} + \frac{\nu_0 + a_0}{(1-\beta)\nu_0 + a_0} \frac{n-1}{\nu + a} + K \right]^2}, \\ &= \frac{(1-\beta) - \beta a_0 \frac{n-1}{\nu + a}}{[(1-\beta)\nu_0 + a_0]^2 \left[ \frac{1}{(1-\beta)\nu_0 + a_0} + \frac{\nu_0 + a_0}{(1-\beta)\nu_0 + a_0} \frac{n-1}{\nu + a} + K \right]^2} \quad (\text{D.9}) \\ &= \frac{(1-\beta) - \beta a_0 \frac{n-1}{\nu + a}}{\left\{ 1 + (\nu_0 + a_0) \frac{n-1}{\nu + a} + [(1-\beta)\nu_0 + a_0]K \right\}^2}, \end{aligned}$$

$$\begin{aligned}
\frac{\partial F}{\partial \nu} &= \frac{\frac{\nu_0 + a_0}{(1 - \beta)\nu_0 + a_0} \frac{n - 1}{(\nu + a)^2}}{\left[ \frac{1}{(1 - \beta)\nu_0 + a_0} + \frac{\nu_0 + a_0}{(1 - \beta)\nu_0 + a_0} \frac{n - 1}{\nu + a} + K \right]^2}, \\
&= \frac{[(1 - \beta)\nu_0 + a_0](\nu_0 + a_0) \frac{n - 1}{(\nu + a)^2}}{\left\{ 1 + (\nu_0 + a_0) \frac{n - 1}{\nu + a} + [(1 - \beta)\nu_0 + a_0]K \right\}^2} \geq 0.
\end{aligned} \tag{D.10}$$

Therefore,

$$\begin{aligned}
\left| \frac{\partial F_0}{\partial \nu_0} \right| + \left| \frac{\partial F_0}{\partial \nu} \right| &= |0| + \left| \frac{n}{[n + (\nu + a)K]^2} \right| = \frac{n}{[n + (\nu + a)K]^2} \\
&< \frac{n}{n^2} = \frac{1}{n} \leq 1,
\end{aligned} \tag{D.11}$$

$$\begin{aligned}
\left| \frac{\partial F}{\partial \nu_0} \right| + \left| \frac{\partial F}{\partial \nu} \right| &= \left| \frac{(1 - \beta) - \beta a_0 \frac{n - 1}{\nu + a}}{\left\{ 1 + (\nu_0 + a_0) \frac{n - 1}{\nu + a} + [(1 - \beta)\nu_0 + a_0]K \right\}^2} \right| \\
&+ \left| \frac{[(1 - \beta)\nu_0 + a_0](\nu_0 + a_0) \frac{n - 1}{(\nu + a)^2}}{\left\{ 1 + (\nu_0 + a_0) \frac{n - 1}{\nu + a} + [(1 - \beta)\nu_0 + a_0]K \right\}^2} \right| \\
&= \frac{\left| (1 - \beta) - \beta a_0 \frac{n - 1}{\nu + a} \right| + [(1 - \beta)\nu_0 + a_0](\nu_0 + a_0) \frac{n - 1}{(\nu + a)^2}}{\left\{ 1 + (\nu_0 + a_0) \frac{n - 1}{\nu + a} + [(1 - \beta)\nu_0 + a_0]K \right\}^2} \\
&\leq \frac{(1 - \beta) + \beta a_0 \frac{n - 1}{\nu + a} + [(1 - \beta)\nu_0 + a_0](\nu_0 + a_0) \frac{n - 1}{(\nu + a)^2}}{\left\{ 1 + (\nu_0 + a_0) \frac{n - 1}{\nu + a} + [(1 - \beta)\nu_0 + a_0]K \right\}^2} \\
&< \frac{1 + 2(\nu_0 + a_0) \frac{n - 1}{\nu + a} + \left[ (\nu_0 + a_0) \frac{n - 1}{\nu + a} \right]^2}{\left[ 1 + (\nu_0 + a_0) \frac{n - 1}{\nu + a} \right]^2} = 1.
\end{aligned} \tag{D.12}$$

Hence,

$$\|\nabla H\|_\infty = \max \left\{ \left| \frac{\partial F_0}{\partial \nu_0} \right| + \left| \frac{\partial F_0}{\partial \nu} \right|, \left| \frac{\partial F}{\partial \nu_0} \right| + \left| \frac{\partial F}{\partial \nu} \right| \right\} < 1. \tag{D.13}$$

Therefore, the function  $H = (F_0, F)$  is a nonexpansive mapping and the fixed point  $(\nu_0^*, \nu^*)$  is unique. In addition, since the corresponding exterior

equilibrium  $(p^*, q_0^*, q^*)$  is unique, too, the interior equilibrium  $(p^*, q_0^*, q^*, \nu_0^*, \nu^*)$  is also unique ■

### Appendix E. Proof of Theorem 4

**Theorem 4.** *The interior equilibrium  $(p^*(\beta), q_0^*(\beta), q^*(\beta), \nu_0^*(\beta), \nu^*(\beta))$  and the function  $\pi^*(\beta)$  are continuously differentiable with respect to  $\beta \in (0, 1]$ . Moreover, the functions  $p^*(\beta)$ ,  $\nu_0^*(\beta)$  and  $\nu^*(\beta)$  are strictly decreasing for all  $\beta \in (0, 1]$ .*

**Proof:** First, we will show that the influence coefficients  $\nu_0^* = \nu_0^*(\beta)$  and  $\nu^* = \nu^*(\beta)$  are continuously differentiable functions with respect to  $\beta \in (0, 1]$ .

To do that, we consider again the functions  $F_0$  and  $F$ , but this time taking into account their dependence with respect to  $\beta$ , i.e.,

$$F_0(\beta, \nu_0, \nu) = \frac{1}{\frac{n}{\nu + a} + K}, \quad (\text{E.1})$$

$$F(\beta, \nu_0, \nu) = \frac{1}{\frac{1}{(1-\beta)\nu_0 + a_0} + \frac{\nu_0 + a_0}{(1-\beta)\nu_0 + a_0} \frac{n-1}{\nu + a} + K}. \quad (\text{E.2})$$

Now, we define the function  $\Phi = (\phi_0, \phi)$ , where

$$\phi_0(\beta, \nu_0, \nu) = \nu_0 - F_0(\beta, \nu_0, \nu), \quad (\text{E.3})$$

$$\phi(\beta, \nu_0, \nu) = \nu - F(\beta, \nu_0, \nu). \quad (\text{E.4})$$

By Theorem 3, the equation

$$\Phi(\beta, \nu_0, \nu) = 0 \quad (\text{E.5})$$

has a unique solution  $\nu_0^*(\beta), \nu^*(\beta) > 0$ , for every  $\beta \in (0, 1]$ .

In addition, it is easy to see that  $\Phi$  is continuously differentiable with respect to  $\beta \in (0, 1]$  and  $\nu_0, \nu \geq 0$ , with

$$\nabla_{(\nu_0, \nu)} \Phi = \frac{\partial \Phi}{\partial (\nu_0, \nu)} = \begin{pmatrix} \frac{\partial \phi_0}{\partial \nu_0} & \frac{\partial \phi_0}{\partial \nu} \\ \frac{\partial \phi}{\partial \nu_0} & \frac{\partial \phi}{\partial \nu} \end{pmatrix} = \begin{pmatrix} 1 - \frac{\partial F_0}{\partial \nu_0} & -\frac{\partial F_0}{\partial \nu} \\ -\frac{\partial F}{\partial \nu_0} & 1 - \frac{\partial F}{\partial \nu} \end{pmatrix}, \quad (\text{E.6})$$

and by (D.13), together with (D.7) and (D.10), we have that

$$\left| \frac{\partial \phi_0}{\partial \nu_0} \right| = \left| 1 - \frac{\partial F_0}{\partial \nu_0} \right| = |1| = 1 > \left| \frac{\partial F_0}{\partial \nu} \right| = \left| \frac{\partial \phi_0}{\partial \nu} \right|, \quad (\text{E.7})$$

$$\left| \frac{\partial \phi}{\partial \nu} \right| = \left| 1 - \frac{\partial F}{\partial \nu} \right| = 1 - \frac{\partial F}{\partial \nu} > \left| \frac{\partial F}{\partial \nu_0} \right| = \left| \frac{\partial \phi}{\partial \nu_0} \right|. \quad (\text{E.8})$$

Then, we can conclude that the matrix  $\nabla_{(\nu_0, \nu)} \Phi$  is diagonally dominant, and, therefore, invertible for every  $\beta \in (0, 1]$ .

Hence, by the implicit function theorem, the functions  $\nu_0^*(\beta)$  and  $\nu^*(\beta)$  are continuously differentiable with respect to  $\beta \in (0, 1]$ , and, in addition,

$$\frac{d(\nu_0^*, \nu^*)}{d\beta} = - \left[ \frac{\partial \Phi}{\partial (\nu_0, \nu)} \right]^{-1} \frac{\partial \Phi}{\partial \beta} = \begin{pmatrix} 1 - \frac{\partial F_0}{\partial \nu_0} & -\frac{\partial F_0}{\partial \nu} \\ -\frac{\partial F}{\partial \nu_0} & 1 - \frac{\partial F}{\partial \nu} \end{pmatrix}^{-1} \begin{pmatrix} \frac{\partial F_0}{\partial \beta} \\ \frac{\partial F}{\partial \beta} \end{pmatrix}, \quad (\text{E.9})$$

where

$$\begin{aligned} \frac{\partial F_0}{\partial \beta} &= 0, & (\text{E.10}) \\ \frac{\partial F}{\partial \beta} &= \frac{\frac{-\nu_0}{[(1-\beta)\nu_0 + a_0]^2} \left[ 1 + (\nu_0 + a_0) \frac{n-1}{\nu+a} \right]}{\left[ \frac{1}{(1-\beta)\nu_0 + a_0} + \frac{\nu_0 + a_0}{(1-\beta)\nu_0 + a_0} \frac{n-1}{\nu+a} + K \right]^2} \\ &= - \frac{\nu_0 \left[ 1 + (\nu_0 + a_0) \frac{n-1}{\nu+a} \right]}{\left\{ 1 + (\nu_0 + a_0) \frac{n-1}{\nu+a} + [(1-\beta)\nu_0 + a_0]K \right\}^2} < 0. \end{aligned} \quad (\text{E.11})$$

Therefore, we have that

$$\frac{d(\nu_0^*, \nu^*)}{d\beta} = \begin{pmatrix} \frac{d\nu_0^*}{d\beta} \\ \frac{d\nu^*}{d\beta} \end{pmatrix} = \begin{pmatrix} 1 & -\frac{\partial F_0}{\partial \nu} \\ -\frac{\partial F}{\partial \nu_0} & 1 - \frac{\partial F}{\partial \nu} \end{pmatrix}^{-1} \begin{pmatrix} 0 \\ \frac{\partial F}{\partial \beta} \end{pmatrix}. \quad (\text{E.12})$$

Now, since  $\nabla_{(\nu_0, \nu)} \Phi$  is invertible for all  $\beta \in (0, 1]$ , then,

$$\det(\nabla_{(\nu_0, \nu)} \Phi) = 1 - \frac{\partial F}{\partial \nu} - \frac{\partial F_0}{\partial \nu} \frac{\partial F}{\partial \nu_0} \neq 0, \quad \forall \beta \in (0, 1], \quad (\text{E.13})$$

and

$$\begin{pmatrix} 1 & -\frac{\partial F_0}{\partial \nu} \\ -\frac{\partial F}{\partial \nu_0} & 1 - \frac{\partial F}{\partial \nu} \end{pmatrix}^{-1} = \frac{1}{1 - \frac{\partial F}{\partial \nu} - \frac{\partial F_0}{\partial \nu} \frac{\partial F}{\partial \nu_0}} \begin{pmatrix} 1 - \frac{\partial F}{\partial \nu} & \frac{\partial F_0}{\partial \nu} \\ \frac{\partial F}{\partial \nu_0} & 1 \end{pmatrix}, \quad (\text{E.14})$$

thus,

$$\begin{pmatrix} \frac{d\nu_0^*}{d\beta} \\ \frac{d\nu^*}{d\beta} \end{pmatrix} = \frac{1}{1 - \frac{\partial F}{\partial \nu} - \frac{\partial F_0}{\partial \nu} \frac{\partial F}{\partial \nu_0}} \begin{pmatrix} 1 - \frac{\partial F}{\partial \nu} & \frac{\partial F_0}{\partial \nu} \\ \frac{\partial F}{\partial \nu_0} & 1 \end{pmatrix} \begin{pmatrix} 0 \\ \frac{\partial F}{\partial \beta} \end{pmatrix}. \quad (\text{E.15})$$

Next, from (E.8) we can see that that

$$1 - \frac{\partial F}{\partial \nu} > 0. \quad (\text{E.16})$$

In addition for  $\beta = 1$  we have that

$$\left. \frac{\partial F}{\partial \nu_0} \right|_{\beta=1} = \frac{-a_0 \frac{n-1}{\nu+a}}{\left[ 1 + (\nu_0 + a_0) \frac{n-1}{\nu+a} + a_0 K \right]^2} \leq 0. \quad (\text{E.17})$$

Then, from (D.8), (E.16) and (E.17),

$$1 - \frac{\partial F}{\partial \nu} - \frac{\partial F_0}{\partial \nu} \frac{\partial F}{\partial \nu_0} > 0, \quad \text{for } \beta = 1. \quad (\text{E.18})$$

Moreover, we know that  $F_0$  and  $F$  are continuously differentiable with respect to  $\beta \in (0, 1]$ , therefore,  $1 - \frac{\partial F}{\partial \nu} - \frac{\partial F_0}{\partial \nu} \frac{\partial F}{\partial \nu_0}$  is continuous respect to  $\beta \in (0, 1]$ , thus, from the inequalities (E.13) and (E.18), we have that

$$1 - \frac{\partial F}{\partial \nu} - \frac{\partial F_0}{\partial \nu} \frac{\partial F}{\partial \nu_0} > 0, \quad \forall \beta \in (0, 1]. \quad (\text{E.19})$$

Therefore, by the relationships (D.8), (E.11) and (E.19),

$$\frac{d\nu_0^*}{d\beta} = \frac{\frac{\partial F_0}{\partial \nu} \frac{\partial F}{\partial \beta}}{1 - \frac{\partial F}{\partial \nu} - \frac{\partial F_0}{\partial \nu} \frac{\partial F}{\partial \nu_0}} < 0, \quad (\text{E.20})$$

$$\frac{d\nu^*}{d\beta} = \frac{\frac{\partial F}{\partial \beta}}{1 - \frac{\partial F}{\partial \nu} - \frac{\partial F_0}{\partial \nu} \frac{\partial F}{\partial \nu_0}} < 0, \quad (\text{E.21})$$

so the functions  $\nu_0^*(\beta)$  and  $\nu^*(\beta)$  are strictly decreasing with respect to  $\beta \in (0, 1]$ .

Because the influence coefficients  $\nu_0^*(\beta)$  and  $\nu^*(\beta)$  are continuously differentiable with respect to  $\beta \in (0, 1]$ , and the exterior equilibrium  $(p(\beta, \nu_0, \nu), q_0(\beta, \nu_0, \nu), q(\beta, \nu_0, \nu))$



is continuously differentiable with respect to  $\beta \in (0, 1]$  and  $\nu_0, \nu \geq 0$  (by Theorem 1), then, the equilibrium

$$(p^*(\beta), q_0^*(\beta), q^*(\beta)) = (p(\beta, \nu_0^*, \nu^*), q_0(\beta, \nu_0^*, \nu^*), q(\beta, \nu_0^*, \nu^*)) \quad (\text{E.22})$$

is continuously differentiable with respect to  $\beta \in (0, 1]$ . Moreover, since  $\pi(p, q)$  is continuously differentiable with respect to any  $p, q \geq 0$  (as we can see from equation (26)), then,  $\pi^*(\beta) = \pi(p^*(\beta), q^*(\beta))$  is also continuously differentiable with respect to  $\beta \in (0, 1]$ .

Next, since  $p^*(\beta) = p(\beta, \nu_0^*, \nu^*)$ , we can apply the chain rule to obtain

$$\frac{dp^*}{d\beta} = \frac{\partial p}{\partial \beta} + \frac{\partial p}{\partial \nu_0} \frac{d\nu_0^*}{d\beta} + \frac{\partial p}{\partial \nu} \frac{d\nu^*}{d\beta}. \quad (\text{E.23})$$

Now, consider the function

$$\Gamma(p, \beta, \nu_0, \nu) = [q_0(p, \beta, \nu_0, \nu) + nq(p, \nu)] - G(p) = 0, \quad (\text{E.24})$$

where, for our particular case,

$$q(p, \nu) = \frac{p - b}{\nu + a}, \quad (\text{E.25})$$

$$q_0(p, \beta, \nu_0, \nu) = \frac{(p - b_0) + \beta n \nu_0 q(p, \nu)}{(1 - \beta)\nu_0 + a_0}, \quad (\text{E.26})$$

$$\begin{aligned} \frac{\partial \Gamma}{\partial p} &= \frac{\partial q_0}{\partial p} + n \frac{\partial q}{\partial p} - G'(p) = \frac{1 + \beta \nu_0 \frac{n}{\nu + a}}{(1 - \beta)\nu_0 + a_0} + \frac{n}{\nu + a} + K \\ &= \frac{1 + (\nu_0 + a_0) \frac{n}{\nu + a}}{(1 - \beta)\nu_0 + a_0} + K > 0. \end{aligned} \quad (\text{E.27})$$

In addition,

$$\begin{aligned} \frac{\partial \Gamma}{\partial \beta} &= \frac{\partial q_0}{\partial \beta} \\ &= \frac{n \nu_0 q(p, \nu) [(1 - \beta)\nu_0 + a_0] + \nu_0 [(p - b_0) + \beta n \nu_0 q(p, \nu)]}{[(1 - \beta)\nu_0 + a_0]^2} \\ &= \frac{\nu_0 [(p - b_0) + n(\nu_0 + a_0)q(p, \nu)]}{[(1 - \beta)\nu_0 + a_0]^2} > 0, \end{aligned} \quad (\text{E.28})$$

$$\begin{aligned} \frac{\partial \Gamma}{\partial \nu_0} &= \frac{\partial q_0}{\partial \nu_0} \\ &= \frac{\beta n q(p, \nu) [(1 - \beta)\nu_0 + a_0] - (1 - \beta) [(p - b_0) + \beta n \nu_0 q(p, \nu)]}{[(1 - \beta)\nu_0 + a_0]^2} \\ &= \frac{\beta n a_0 q(p, \nu) - (1 - \beta)(p - b_0)}{[(1 - \beta)\nu_0 + a_0]^2}, \end{aligned} \quad (\text{E.29})$$

$$\begin{aligned}
\frac{\partial \Gamma}{\partial \nu} &= \frac{\partial q_0}{\partial \nu} + n \frac{\partial q}{\partial \nu} = \frac{\beta n \nu_0}{(1-\beta)\nu_0 + a_0} \frac{\partial q}{\partial \nu} + n \frac{\partial q}{\partial \nu} = \frac{n(\nu_0 + a_0)}{(1-\beta)\nu_0 + a_0} \frac{\partial q}{\partial \nu} \\
&= -\frac{n(\nu_0 + a_0)}{(1-\beta)\nu_0 + a_0} \frac{p-b}{(\nu+a)^2} < 0.
\end{aligned} \tag{E.30}$$

Therefore, by the implicit function theorem,

$$\frac{\partial p}{\partial \beta} = -\frac{\frac{\partial \Gamma}{\partial \beta}}{\frac{\partial \Gamma}{\partial p}}, \quad \frac{\partial p}{\partial \nu_0} = -\frac{\frac{\partial \Gamma}{\partial \nu_0}}{\frac{\partial \Gamma}{\partial p}}, \quad \frac{\partial p}{\partial \nu} = -\frac{\frac{\partial \Gamma}{\partial \nu}}{\frac{\partial \Gamma}{\partial p}}, \tag{E.31}$$

then, from equalities (E.23) and (E.31),

$$p^{*'}(\beta) = \frac{dp^*}{d\beta} = -\frac{\frac{\partial \Gamma}{\partial \beta} + \frac{\partial \Gamma}{\partial \nu_0} \frac{d\nu_0^*}{d\beta} + \frac{\partial \Gamma}{\partial \nu} \frac{d\nu^*}{d\beta}}{\frac{\partial \Gamma}{\partial p}}, \tag{E.32}$$

and from the equalities (E.28) and (E.29), we can see that

$$\begin{aligned}
\frac{\partial \Gamma}{\partial \beta} + \frac{\partial \Gamma}{\partial \nu_0} \frac{d\nu_0^*}{d\beta} &= \frac{\nu_0^*[(p^* - b_0) + n(\nu_0^* + a_0)q(p^*, \nu^*)]}{[(1-\beta)\nu_0^* + a_0]^2} \\
&\quad + \frac{\beta n a_0 q(p^*, \nu^*) - (1-\beta)(p^* - b_0)}{[(1-\beta)\nu_0^* + a_0]^2} \nu_0^{*'} \\
&= \frac{\nu_0^*(p^* - b_0) + nq(p^*, \nu^*)[\nu_0^{*2} + a_0(\nu_0^* + \beta\nu_0^{*'})]}{[(1-\beta)\nu_0^* + a_0]^2} \\
&\quad + \frac{(1-\beta)(p^* - b_0)}{[(1-\beta)\nu_0^* + a_0]^2} (-\nu_0^{*'}).
\end{aligned} \tag{E.33}$$

Now, we are going to analyze the sign of  $\nu_0^* + \beta\nu_0^{*'}$ .

First, from the equality (D.8), we can see that

$$\frac{\partial F_0}{\partial \nu} = \frac{n}{[n + (\nu + a)K]^2} < \frac{n}{n^2} = \frac{1}{n} \leq 1. \tag{E.34}$$

Second, from the identities (D.9) and (E.11), we have that

$$\begin{aligned}
\frac{\partial F}{\partial \nu_0} - \frac{\beta}{\nu_0} \frac{\partial F}{\partial \beta} &= \frac{(1-\beta) - \beta a_0 \frac{n-1}{\nu+a}}{\left\{ 1 + (\nu_0 + a_0) \frac{n-1}{\nu+a} + [(1-\beta)\nu_0 + a_0]K \right\}^2} \\
&\quad + \frac{\beta}{\nu_0} \frac{\nu_0 \left[ 1 + (\nu_0 + a_0) \frac{n-1}{\nu+a} \right]}{\left\{ 1 + (\nu_0 + a_0) \frac{n-1}{\nu+a} + [(1-\beta)\nu_0 + a_0]K \right\}^2} \\
&= \frac{(1-\beta) - \beta a_0 \frac{n-1}{\nu+a} + \beta \left[ 1 + (\nu_0 + a_0) \frac{n-1}{\nu+a} \right]}{\left\{ 1 + (\nu_0 + a_0) \frac{n-1}{\nu+a} + [(1-\beta)\nu_0 + a_0]K \right\}^2} \\
&= \frac{1 + \beta \nu_0 \frac{n-1}{\nu+a}}{\left\{ 1 + (\nu_0 + a_0) \frac{n-1}{\nu+a} + [(1-\beta)\nu_0 + a_0]K \right\}^2} > 0.
\end{aligned} \tag{E.35}$$

And third, from the equalities (D.10) and (E.35), we get

$$\begin{aligned}
\frac{\partial F}{\partial \nu} + \frac{\partial F}{\partial \nu_0} - \frac{\beta}{\nu_0} \frac{\partial F}{\partial \beta} &= \frac{[(1-\beta)\nu_0 + a_0](\nu_0 + a_0) \frac{n-1}{(\nu+a)^2}}{\left\{ 1 + (\nu_0 + a_0) \frac{n-1}{\nu+a} + [(1-\beta)\nu_0 + a_0]K \right\}^2} \\
&\quad + \frac{1 + \beta \nu_0 \frac{n-1}{\nu+a}}{\left\{ 1 + (\nu_0 + a_0) \frac{n-1}{\nu+a} + [(1-\beta)\nu_0 + a_0]K \right\}^2} \\
&= \frac{1 + \beta \nu_0 \frac{n-1}{\nu+a} + [(1-\beta)\nu_0 + a_0](\nu_0 + a_0) \frac{n-1}{(\nu+a)^2}}{\left\{ 1 + (\nu_0 + a_0) \frac{n-1}{\nu+a} + [(1-\beta)\nu_0 + a_0]K \right\}^2} \\
&< \frac{1 + 2(\nu_0 + a_0) \frac{n-1}{\nu+a} + (\nu_0 + a_0)^2 \frac{(n-1)^2}{(\nu+a)^2}}{\left[ 1 + (\nu_0 + a_0) \frac{n-1}{\nu+a} \right]^2} = 1.
\end{aligned} \tag{E.36}$$

Then, using the relationships (E.19), (E.20), (E.34), (E.35) (E.36), we obtain

$$\begin{aligned}
\nu_0^* + \beta\nu_0^{*'} &= \nu_0^* + \beta \frac{\frac{\partial F_0}{\partial \nu} \frac{\partial F}{\partial \beta}}{1 - \frac{\partial F}{\partial \nu} - \frac{\partial F_0}{\partial \nu} \frac{\partial F}{\partial \nu_0}} \\
&= \frac{\nu_0^* \left(1 - \frac{\partial F}{\partial \nu} - \frac{\partial F_0}{\partial \nu} \frac{\partial F}{\partial \nu_0}\right) + \beta \frac{\partial F_0}{\partial \nu} \frac{\partial F}{\partial \beta}}{1 - \frac{\partial F}{\partial \nu} - \frac{\partial F_0}{\partial \nu} \frac{\partial F}{\partial \nu_0}} \\
&= \frac{\nu_0^*}{1 - \frac{\partial F}{\partial \nu} - \frac{\partial F_0}{\partial \nu} \frac{\partial F}{\partial \nu_0}} \left[1 - \frac{\partial F}{\partial \nu} - \frac{\partial F_0}{\partial \nu} \left(\frac{\partial F}{\partial \nu_0} - \frac{\beta}{\nu_0^*} \frac{\partial F}{\partial \beta}\right)\right] \quad (\text{E.37}) \\
&> \frac{\nu_0^*}{1 - \frac{\partial F}{\partial \nu} - \frac{\partial F_0}{\partial \nu} \frac{\partial F}{\partial \nu_0}} \left[1 - \frac{\partial F}{\partial \nu} - \left(\frac{\partial F}{\partial \nu_0} - \frac{\beta}{\nu_0^*} \frac{\partial F}{\partial \beta}\right)\right] \\
&= \frac{\nu_0^*}{1 - \frac{\partial F}{\partial \nu} - \frac{\partial F_0}{\partial \nu} \frac{\partial F}{\partial \nu_0}} \left[1 - \left(\frac{\partial F}{\partial \nu} + \frac{\partial F}{\partial \nu_0} - \frac{\beta}{\nu_0^*} \frac{\partial F}{\partial \beta}\right)\right] > 0.
\end{aligned}$$

Finally, applying the inequalities (E.20), (E.37), and the assumption **A5**, to (E.33), we can see that

$$\begin{aligned}
\frac{\partial \Gamma}{\partial \beta} + \frac{\partial \Gamma}{\partial \nu_0} \frac{d\nu_0^*}{d\beta} &= \frac{\nu_0^*(p^* - b_0) + nq(p^*, \nu^*)[\nu_0^{*2} + a_0(\nu_0^* + \beta\nu_0^{*'})]}{[(1 - \beta)\nu_0^* + a_0]^2} \\
&\quad + \frac{(1 - \beta)(p^* - b_0)}{[(1 - \beta)\nu_0^* + a_0]^2} (-\nu_0^{*'}) > 0. \quad (\text{E.38})
\end{aligned}$$

Therefore, applying the inequalities (E.21), (E.27), (E.30) and (E.38), to (E.32), we obtain

$$p^{*'}(\beta) = - \frac{\frac{\partial \Gamma}{\partial \beta} + \frac{\partial \Gamma}{\partial \nu_0} \frac{d\nu_0^*}{d\beta} + \frac{\partial \Gamma}{\partial \nu} \frac{d\nu^*}{d\beta}}{\frac{\partial \Gamma}{\partial p}} < 0, \quad (\text{E.39})$$

which proves that  $p^*(\beta)$  is strictly decreasing with respect to  $\beta \in (0, 1]$  ■

## Appendix F. Proof of Theorem 5

**Theorem 5.** *Under assumptions **A4**, **A5** and **A6**, the exterior equilibrium  $(p^c(\beta), q_0^c(\beta), q^c(\beta))$  and the function  $\pi^c(\beta)$  are continuously differentiable with respect to  $\beta \in (0, 1]$ . Moreover, the function  $p^c(\beta)$  is strictly decreasing for all  $\beta \in (0, 1]$ .*

**Proof:** From Theorem 1 we have that the exterior equilibrium  $(p^c(\beta), q_0^c(\beta), q^c(\beta))$ , corresponding to the influence coefficients  $(\nu_0^c, \nu^c) = \left(\frac{1}{K}, \frac{1}{K}\right)$ , is continuously differentiable with respect to  $\beta \in (0, 1]$ . Moreover, since  $\pi(p, q)$  is continuously differentiable with respect to any  $p, q \geq 0$  (as we can see from equation (26)), then,  $\pi^c(\beta) = \pi(p^c(\beta), q^c(\beta))$  is also continuously differentiable with respect to  $\beta \in (0, 1]$ .

Next, in the same way as in the proof of Theorem 4, we consider the functions  $q_0(p, \beta, \nu_0, \nu)$ ,  $q(p, \nu)$  and  $\Gamma(p, \beta, \nu_0, \nu)$ , given by (E.24), (E.25) and (E.26), and define the implicit function

$$\begin{aligned}\Gamma^c(p, \beta) &= \Gamma\left(p, \beta, \frac{1}{K}, \frac{1}{K}\right) \\ &= \left[ q_0\left(p, \beta, \frac{1}{K}, \frac{1}{K}\right) + nq\left(p, \frac{1}{K}\right) \right] - G(p) = 0,\end{aligned}\tag{F.1}$$

where (similarly to the proof of Theorem 4)

$$\frac{\partial \Gamma^c}{\partial p} = \frac{1 + \left(\frac{1}{K} + a_0\right) \frac{n}{\frac{1}{K} + a}}{(1 - \beta) \frac{1}{K} + a_0} + K > 0,\tag{F.2}$$

and

$$\frac{\partial \Gamma^c}{\partial \beta} = \frac{\frac{1}{K} \left[ (p - b_0) + n \left( \frac{1}{K} + a_0 \right) q \left( p, \frac{1}{K} \right) \right]}{\left[ (1 - \beta) \frac{1}{K} + a_0 \right]^2} > 0.\tag{F.3}$$

Hence, by the implicit function theorem,

$$p^{c'}(\beta) = \frac{dp^c}{d\beta} = - \frac{\frac{\partial \Gamma^c}{\partial \beta}}{\frac{\partial \Gamma^c}{\partial p}} < 0,\tag{F.4}$$

which proves that  $p^c(\beta)$  is strictly decreasing with respect to  $\beta \in (0, 1]$  ■

## Appendix G. Proof of Theorem 6

**Theorem 6.** *Under assumptions A4, A5 and A6, the exterior equilibrium  $(p^t(\beta), q_0^t(\beta), q^t(\beta))$  and the function  $\pi^t(\beta)$  are constant with respect to  $\beta \in (0, 1]$ .*

**Proof:** From Theorem 1 we have that the exterior equilibrium  $(p^t(\beta), q_0^t(\beta), q^t(\beta))$ , corresponding to the influence coefficients  $(\nu_0^t, \nu^t) = (0, 0)$ , is continuously differentiable with respect to  $\beta \in (0, 1]$ .

Again, in the same way as in the proof of Theorem 4, we consider the functions  $q_0(p, \beta, \nu_0, \nu)$ ,  $q(p, \nu)$  and  $\Gamma(p, \beta, \nu_0, \nu)$ , given by (E.24), (E.25) and (E.26), and define the implicit function

$$\begin{aligned}\Gamma^t(p, \beta) &= \Gamma(p, \beta, 0, 0) \\ &= [q_0(p, \beta, 0, 0) + nq(p, 0)] - G(p) = 0,\end{aligned}\tag{G.1}$$

where (similarly to the proof of Theorem 4)

$$\frac{\partial \Gamma^t}{\partial p} = \frac{1 + a_0 \frac{n}{a}}{a_0} + K > 0,\tag{G.2}$$

and

$$\frac{\partial \Gamma^t}{\partial \beta} = 0.\tag{G.3}$$

Hence, by the implicit function theorem,

$$p^{t'}(\beta) = \frac{dp^t}{d\beta} = -\frac{\frac{\partial \Gamma^t}{\partial \beta}}{\frac{\partial \Gamma^t}{\partial p}} = 0,\tag{G.4}$$

which proves that  $p^t = p^t(\beta)$  is constant with respect to  $\beta \in (0, 1]$ .

Substituting the values  $p^t$  and  $\nu_0^t = \nu^t = 0$ , in the expressions of  $q_0(p, \beta, \nu_0, \nu)$  and  $q(p, \nu)$  given by (E.25) and (E.26), we obtain

$$q_0^t(\beta) = q_0(p^t, \beta, 0, 0) = \frac{p^t - b_0}{a_0},\tag{G.5}$$

$$q^t(\beta) = q(p^t, 0) = \frac{p^t - b}{a},\tag{G.6}$$

then,  $q_0^t = q_0^t(\beta)$  and  $q^t = q^t(\beta)$  are also constant with respect to  $\beta \in (0, 1]$ , which implies that  $\pi^t = \pi^t(\beta) = \pi(p^t, q^t)$  is constant with respect to  $\beta \in (0, 1]$ , too■

## Appendix H. Proof of Theorem 7

**Theorem 7.** *Under the assumptions A4, A5 and A6, the following inequalities hold:*

$$\lim_{\beta \downarrow 0} p^c(\beta) > \lim_{\beta \downarrow 0} p^*(\beta) > p^t. \quad (40)$$

**Proof:** From the equations (E.24), (E.25), (E.26) and the assumption A4, we have that

$$\begin{aligned} \Gamma(p, \beta, \nu_0, \nu) &= \frac{(p - b_0) + \beta n \nu_0 \frac{p - b}{\nu + a}}{(1 - \beta)\nu_0 + a_0} + n \frac{p - b}{\nu + a} + Kp - T \\ &= \frac{(p - b_0) + n(\nu_0 + a_0) \frac{p - b}{\nu + a}}{(1 - \beta)\nu_0 + a_0} + Kp - T \\ &= p \left[ \frac{1 + (\nu_0 + a_0) \frac{n}{\nu + a}}{(1 - \beta)\nu_0 + a_0} + K \right] \\ &\quad - \left[ \frac{b_0 + (\nu_0 + a_0) \frac{nb}{\nu + a}}{(1 - \beta)\nu_0 + a_0} + T \right] = 0, \end{aligned} \quad (H.1)$$

from which we can isolate  $p$  to obtain

$$p(\beta, \nu_0, \nu) = \frac{\frac{b_0 + (\nu_0 + a_0) \frac{nb}{\nu + a}}{(1 - \beta)\nu_0 + a_0} + T}{\frac{1 + (\nu_0 + a_0) \frac{n}{\nu + a}}{(1 - \beta)\nu_0 + a_0} + K}. \quad (H.2)$$

Now, we are going to prove that

$$\lim_{\beta \downarrow 0} p^c(\beta) > \lim_{\beta \downarrow 0} p^*(\beta) > p^t, \quad (40)$$

where

$$p^*(\beta) = p(\beta, \nu_0^*(\beta), \nu^*(\beta)) = \frac{\frac{b_0 + (\nu_0^* + a_0) \frac{nb}{\nu^* + a}}{(1 - \beta)\nu_0^* + a_0} + T}{\frac{1 + (\nu_0^* + a_0) \frac{n}{\nu^* + a}}{(1 - \beta)\nu_0^* + a_0} + K}, \quad (H.3)$$

$$p^c(\beta) = p\left(\beta, \frac{1}{K}, \frac{1}{K}\right) = \frac{\frac{b_0 + \left(\frac{1}{K} + a_0\right) \frac{nb}{\frac{1}{K} + a}}{\frac{1}{K} + a_0} + T}{1 + \left(\frac{1}{K} + a_0\right) \frac{n}{\frac{1}{K} + a} + K}, \quad (\text{H.4})$$

$$p^t \equiv p(\beta, 0, 0) = \frac{\frac{b_0 + a_0 \frac{nb}{a}}{a_0} + T}{1 + a_0 \frac{n}{a} + K}. \quad (\text{H.5})$$

First, we are going to show that

$$\lim_{\beta \downarrow 0} p^c(\beta) > \lim_{\beta \downarrow 0} p^*(\beta). \quad (\text{H.6})$$

In order to do that, we are going to introduce the notation

$$\tilde{\nu}_0^* = \lim_{\beta \downarrow 0} \nu_0^*(\beta), \quad (\text{H.7})$$

$$\tilde{\nu}^* = \lim_{\beta \downarrow 0} \nu^*(\beta). \quad (\text{H.8})$$

From the equations (30) and (31) of the consistency criterion for our particular case, we can see that  $\nu_0^*(\beta), \nu^*(\beta) < \frac{1}{K}$  for all  $\beta \in (0, 1]$ , which, together with the strictly decreasing behavior of  $\nu_0^*(\beta)$  and  $\nu^*(\beta)$  with respect to  $\beta \in (0, 1]$ , imply that the values  $\tilde{\nu}_0^*$  and  $\tilde{\nu}^*$  exist.

Then, we can calculate the difference

$$\begin{aligned} & \lim_{\beta \downarrow 0} p^c(\beta) - \lim_{\beta \downarrow 0} p^*(\beta) \\ &= \frac{\frac{b_0 + \left(\frac{1}{K} + a_0\right) \frac{nb}{\frac{1}{K} + a}}{\frac{1}{K} + a_0} + T}{1 + \left(\frac{1}{K} + a_0\right) \frac{n}{\frac{1}{K} + a} + K} - \frac{\frac{b_0 + (\tilde{\nu}_0^* + a_0) \frac{nb}{\tilde{\nu}^* + a}}{\tilde{\nu}_0^* + a_0} + T}{1 + (\tilde{\nu}_0^* + a_0) \frac{n}{\tilde{\nu}^* + a} + K} \\ &= \frac{\frac{b_0}{\frac{1}{K} + a_0} + \frac{nb}{\frac{1}{K} + a} + T}{\frac{1}{K} + a_0 + \frac{n}{\frac{1}{K} + a} + K} - \frac{\frac{b_0}{\tilde{\nu}_0^* + a_0} + \frac{nb}{\tilde{\nu}^* + a} + T}{\frac{1}{\tilde{\nu}_0^* + a_0} + \frac{n}{\tilde{\nu}^* + a} + K} = \frac{S_1}{S_2}, \end{aligned} \quad (\text{H.9})$$



where

$$S_1 = \left( \frac{1}{\tilde{\nu}_0^* + a_0} + \frac{n}{\tilde{\nu}^* + a} + K \right) \left( \frac{b_0}{\frac{1}{K} + a_0} + \frac{nb}{\frac{1}{K} + a} + T \right) - \left( \frac{1}{\frac{1}{K} + a_0} + \frac{n}{\frac{1}{K} + a} + K \right) \left( \frac{b_0}{\tilde{\nu}_0^* + a_0} + \frac{nb}{\tilde{\nu}^* + a} + T \right), \quad (\text{H.10})$$

$$S_2 = \left( \frac{1}{\frac{1}{K} + a_0} + \frac{n}{\frac{1}{K} + a} + K \right) \left( \frac{1}{\tilde{\nu}_0^* + a_0} + \frac{n}{\tilde{\nu}^* + a} + K \right) > 0. \quad (\text{H.11})$$

Now, we analyze the sign of  $S_1$ :

$$\begin{aligned} S_1 &= \left( \frac{1}{\tilde{\nu}_0^* + a_0} + \frac{n}{\tilde{\nu}^* + a} \right) \left( \frac{b_0}{\frac{1}{K} + a_0} + \frac{nb}{\frac{1}{K} + a} \right) \\ &\quad + K \left( \frac{b_0}{\frac{1}{K} + a_0} + \frac{nb}{\frac{1}{K} + a} \right) + \left( \frac{1}{\tilde{\nu}_0^* + a_0} + \frac{n}{\tilde{\nu}^* + a} \right) T \\ &\quad + KT - \left( \frac{1}{\frac{1}{K} + a_0} + \frac{n}{\frac{1}{K} + a} \right) \left( \frac{b_0}{\tilde{\nu}_0^* + a_0} + \frac{nb}{\tilde{\nu}^* + a} \right) \\ &\quad - K \left( \frac{b_0}{\tilde{\nu}_0^* + a_0} + \frac{nb}{\tilde{\nu}^* + a} \right) - \left( \frac{1}{\frac{1}{K} + a_0} + \frac{n}{\frac{1}{K} + a} \right) T \\ &\quad - KT \\ &= -nb \left( \frac{1}{\tilde{\nu}^* + a} \frac{1}{\frac{1}{K} + a_0} - \frac{1}{\tilde{\nu}_0^* + a_0} \frac{1}{\frac{1}{K} + a} \right) \\ &\quad + nb_0 \left( \frac{1}{\tilde{\nu}^* + a} \frac{1}{\frac{1}{K} + a_0} - \frac{1}{\tilde{\nu}_0^* + a_0} \frac{1}{\frac{1}{K} + a} \right) \\ &\quad - K \left[ nb \left( \frac{1}{\tilde{\nu}^* + a} - \frac{1}{\frac{1}{K} + a} \right) + b_0 \left( \frac{1}{\tilde{\nu}_0^* + a_0} - \frac{1}{\frac{1}{K} + a_0} \right) \right] \\ &\quad + T \left[ n \left( \frac{1}{\tilde{\nu}^* + a} - \frac{1}{\frac{1}{K} + a} \right) + \left( \frac{1}{\tilde{\nu}_0^* + a_0} - \frac{1}{\frac{1}{K} + a_0} \right) \right] \\ &= nG(b) \left( \frac{1}{\tilde{\nu}^* + a} - \frac{1}{\frac{1}{K} + a} \right) \\ &\quad - n(b - b_0) \left( \frac{1}{\tilde{\nu}^* + a} \frac{1}{\frac{1}{K} + a_0} - \frac{1}{\tilde{\nu}_0^* + a_0} \frac{1}{\frac{1}{K} + a} \right) \\ &\quad + G(b_0) \left( \frac{1}{\tilde{\nu}_0^* + a_0} - \frac{1}{\frac{1}{K} + a_0} \right) \end{aligned} \quad (\text{H.12})$$

Since the limits  $\tilde{\nu}_0^* = \lim_{\beta \downarrow 0} \nu_0^*(\beta)$  and  $\tilde{\nu}^* = \lim_{\beta \downarrow 0} \nu^*(\beta)$  exist, it is easy to see that the equations (30) and (31) must hold for the values  $\nu_0 = \tilde{\nu}_0^*$  and  $\nu = \tilde{\nu}^*$ , implying that

$$\tilde{\nu}_0^*, \tilde{\nu}^* < \frac{1}{K}, \quad (\text{H.13})$$

therefore,

$$\frac{1}{\tilde{\nu}_0^* + a_0} > \frac{1}{\frac{1}{K} + a_0}, \quad (\text{H.14})$$

$$\frac{1}{\tilde{\nu}^* + a} > \frac{1}{\frac{1}{K} + a}. \quad (\text{H.15})$$

In addition, by the assumption **A5** and **A6**, we have that

$$G(b) > \frac{b - b_0}{a_0} \geq 0 \quad (\text{H.16})$$

which, together with the fact that  $G(p)$  is strictly decreasing with respect to  $p$ , imply that

$$G(b_0) \geq G(b) > 0, \quad (\text{H.17})$$

and

$$G(b) - \frac{b - b_0}{\tilde{\nu}_0^* + a_0} > 0. \quad (\text{H.18})$$

Then, by the inequalities (H.14), (H.15), (H.17), (H.18), and the assumption **A5**, we obtain

$$\begin{aligned} S_1 &\geq nG(b) \left( \frac{1}{\tilde{\nu}^* + a} - \frac{1}{\frac{1}{K} + a} \right) \\ &\quad - n(b - b_0) \left( \frac{1}{\tilde{\nu}^* + a} \frac{1}{\tilde{\nu}_0^* + a_0} - \frac{1}{\tilde{\nu}_0^* + a_0} \frac{1}{\frac{1}{K} + a} \right) \\ &\quad + G(b_0) \left( \frac{1}{\tilde{\nu}_0^* + a_0} - \frac{1}{\frac{1}{K} + a_0} \right) \\ &= n \left( G(b) - \frac{b - b_0}{\tilde{\nu}_0^* + a_0} \right) \left( \frac{1}{\tilde{\nu}^* + a} - \frac{1}{\frac{1}{K} + a} \right) \\ &\quad + G(b_0) \left( \frac{1}{\tilde{\nu}_0^* + a_0} - \frac{1}{\frac{1}{K} + a_0} \right) > 0. \end{aligned} \quad (\text{H.19})$$

Therefore, applying the relationships (H.11) and (H.19) to (H.9), we get

$$\lim_{\beta \downarrow 0} p^c(\beta) - \lim_{\beta \downarrow 0} p^*(\beta) = \frac{S_1}{S_2} > 0. \quad (\text{H.20})$$

In other words,  $\lim_{\beta \downarrow 0} p^c(\beta) > \lim_{\beta \downarrow 0} p^*(\beta)$ .

Now, we show that

$$\lim_{\beta \downarrow 0} p^*(\beta) > p^t. \quad (\text{H.21})$$

In order to do that, we calculate the difference

$$\begin{aligned}
& \lim_{\beta \downarrow 0} p^*(\beta) - p^\dagger \\
&= \frac{b_0 + (\tilde{\nu}_0^* + a_0) \frac{nb}{\tilde{\nu}^* + a} + T}{\tilde{\nu}_0^* + a_0} - \frac{b_0 + a_0 \frac{nb}{a} + T}{a_0} \\
&= \frac{1 + (\tilde{\nu}_0^* + a_0) \frac{n}{\tilde{\nu}^* + a} + K}{\tilde{\nu}_0^* + a_0} - \frac{1 + a_0 \frac{n}{a} + K}{a_0} \quad (\text{H.22}) \\
&= \frac{\frac{b_0}{\tilde{\nu}_0^* + a_0} + \frac{nb}{\tilde{\nu}^* + a} + T}{\frac{1}{\tilde{\nu}_0^* + a_0} + \frac{n}{\tilde{\nu}^* + a} + K} - \frac{\frac{b_0}{a_0} + \frac{nb}{a} + T}{\frac{1}{a_0} + \frac{n}{a} + K} = \frac{R_1}{R_2},
\end{aligned}$$

where

$$\begin{aligned}
R_1 &= \left( \frac{1}{a_0} + \frac{n}{a} + K \right) \left( \frac{b_0}{\tilde{\nu}_0^* + a_0} + \frac{nb}{\tilde{\nu}^* + a} + T \right) \\
&\quad - \left( \frac{1}{\tilde{\nu}_0^* + a_0} + \frac{n}{\tilde{\nu}^* + a} + K \right) \left( \frac{b_0}{a_0} + \frac{nb}{a} + T \right), \quad (\text{H.23})
\end{aligned}$$

$$R_2 = \left( \frac{1}{\tilde{\nu}_0^* + a_0} + \frac{n}{\tilde{\nu}^* + a} + K \right) \left( \frac{1}{a_0} + \frac{n}{a} + K \right) > 0. \quad (\text{H.24})$$

Now, we analyze the sign of  $R_1$ :

$$\begin{aligned}
R_1 &= \left(\frac{1}{a_0} + \frac{n}{a}\right) \left(\frac{b_0}{\tilde{\nu}_0^* + a_0} + \frac{nb}{\tilde{\nu}^* + a}\right) + K \left(\frac{b_0}{\tilde{\nu}_0^* + a_0} + \frac{nb}{\tilde{\nu}^* + a}\right) \\
&\quad + \left(\frac{1}{a_0} + \frac{n}{a}\right) T + KT \\
&\quad - \left(\frac{1}{\tilde{\nu}_0^* + a_0} + \frac{n}{\tilde{\nu}^* + a}\right) \left(\frac{b_0}{a_0} + \frac{nb}{a}\right) - K \left(\frac{b_0}{a_0} + \frac{nb}{a}\right) \\
&\quad - \left(\frac{1}{\tilde{\nu}_0^* + a_0} + \frac{n}{\tilde{\nu}^* + a}\right) T - KT \\
&= -nb \left(\frac{1}{a} \frac{1}{\tilde{\nu}_0^* + a_0} - \frac{1}{a_0} \frac{1}{\tilde{\nu}^* + a}\right) + nb_0 \left(\frac{1}{a} \frac{1}{\tilde{\nu}_0^* + a_0} - \frac{1}{a_0} \frac{1}{\tilde{\nu}^* + a}\right) \\
&\quad - K \left[ nb \left(\frac{1}{a} - \frac{1}{\tilde{\nu}^* + a}\right) + b_0 \left(\frac{1}{a_0} - \frac{1}{\tilde{\nu}_0^* + a_0}\right) \right] \\
&\quad + T \left[ n \left(\frac{1}{a} - \frac{1}{\tilde{\nu}^* + a}\right) + \left(\frac{1}{a_0} - \frac{1}{\tilde{\nu}_0^* + a_0}\right) \right] \\
&= nG(b) \left(\frac{1}{a} - \frac{1}{\tilde{\nu}^* + a}\right) \\
&\quad - n(b - b_0) \left(\frac{1}{a} \frac{1}{\tilde{\nu}_0^* + a_0} - \frac{1}{a_0} \frac{1}{\tilde{\nu}^* + a}\right) \\
&\quad + G(b_0) \left(\frac{1}{a_0} - \frac{1}{\tilde{\nu}_0^* + a_0}\right)
\end{aligned} \tag{H.25}$$

Again, from the equations (30) and (31), it is easy to see that

$$\tilde{\nu}_0^*, \tilde{\nu}^* > 0, \tag{H.26}$$

therefore,

$$\frac{1}{a_0} > \frac{1}{\tilde{\nu}_0^* + a_0}, \tag{H.27}$$

$$\frac{1}{a} > \frac{1}{\tilde{\nu}^* + a}, \tag{H.28}$$

and, from inequality (H.16), we have that

$$G(b) - \frac{b - b_0}{a_0} > 0. \tag{H.29}$$

Then, by the inequalities (H.17), (H.27), (H.28), (H.29), and the assumption

**A5**, we obtain

$$\begin{aligned}
R_1 &\geq nG(b) \left( \frac{1}{a} - \frac{1}{\tilde{\nu}^* + a} \right) - n(b - b_0) \left( \frac{1}{a} \frac{1}{a_0} - \frac{1}{a_0} \frac{1}{\tilde{\nu}^* + a} \right) \\
&\quad + G(b_0) \left( \frac{1}{a_0} - \frac{1}{\tilde{\nu}_0^* + a_0} \right) \\
&= n \left( G(b) - \frac{b - b_0}{a_0} \right) \left( \frac{1}{a} - \frac{1}{\tilde{\nu}^* + a} \right) \\
&\quad + G(b_0) \left( \frac{1}{a_0} - \frac{1}{\tilde{\nu}_0^* + a_0} \right) > 0.
\end{aligned} \tag{H.30}$$

Therefore, applying the relationships (H.24) and (H.30) to (H.22), we get

$$\lim_{\beta \downarrow 0} p^*(\beta) - p^t = \frac{R_1}{R_2} > 0. \tag{H.31}$$

In other words,  $\lim_{\beta \downarrow 0} p^*(\beta) > p^t$  ■

## Appendix I. Proof of Theorem 8

**Theorem 8.** *Under the assumptions **A4**, **A5** and **A6**, for any  $\beta \in (0, 1]$ , if  $\pi^c(\beta) \geq \pi^*(\beta)$ , then, it is satisfied that  $p^*(\beta) < p^c(\beta)$ .*

**Proof:** Let  $\beta \in (0, 1]$  such that  $\pi^c(\beta) \geq \pi^*(\beta)$ .

First, we substitute the value of  $q^* = q^*(\beta) = q(p^*(\beta), \nu^*(\beta))$ , given by (E.25), in the expression of  $\pi^*(\beta) = \pi(p^*(\beta), q^*(\beta))$ , given by (26):

$$\begin{aligned}
\pi^*(\beta) &= p^* q^* - \frac{1}{2} a q^{*2} - b q^* = \left( p^* - b - \frac{1}{2} a q^* \right) q^* \\
&= \left[ (\nu^* + a) \frac{p^* - b}{\nu^* + a} - \frac{1}{2} a \frac{p^* - b}{\nu^* + a} \right] \frac{p^* - b}{\nu^* + a} \\
&= \left( \nu^* + \frac{1}{2} a \right) \left( \frac{p^* - b}{\nu^* + a} \right)^2.
\end{aligned} \tag{I.1}$$

Similarly, we can get

$$\pi^c(\beta) = p^c q^c - \frac{1}{2} a q^{c2} - b q^c = \left( \frac{1}{K} + \frac{1}{2} a \right) \left( \frac{p^c - b}{\frac{1}{K} + a} \right)^2. \tag{I.2}$$

Now, suppose that  $p^*(\beta) \geq p^c(\beta)$ , then,

$$\begin{aligned}
\pi^*(\beta) - \pi^c(\beta) &= \left(\nu^* + \frac{1}{2}a\right) \left(\frac{p^* - b}{\nu^* + a}\right)^2 - \left(\frac{1}{K} + \frac{1}{2}a\right) \left(\frac{p^c - b}{\frac{1}{K} + a}\right)^2 \\
&\geq \left(\nu^* + \frac{1}{2}a\right) \left(\frac{p^c - b}{\nu^* + a}\right)^2 - \left(\frac{1}{K} + \frac{1}{2}a\right) \left(\frac{p^c - b}{\frac{1}{K} + a}\right)^2 \\
&= \left[ \frac{\nu^* + \frac{1}{2}a}{(\nu^* + a)^2} - \frac{\frac{1}{K} + \frac{1}{2}a}{\left(\frac{1}{K} + a\right)^2} \right] (p^c - b)^2 \\
&= \frac{\left[\left(\frac{1}{K} + a\right)^2 \left(\nu^* + \frac{1}{2}a\right) - (\nu^* + a)^2 \left(\frac{1}{K} + \frac{1}{2}a\right)\right]}{(\nu^* + a)^2 \left(\frac{1}{K} + a\right)^2} (p^c - b)^2 \\
&= \frac{\left(\frac{1}{K} - \nu^*\right) \left(\frac{1}{K}\nu^* + \frac{1}{2}\nu^*a + \frac{1}{2}\frac{1}{K}a\right)}{(\nu^* + a)^2 \left(\frac{1}{K} + a\right)^2} (p^c - b)^2 > 0,
\end{aligned} \tag{I.3}$$

which implies that  $\pi^c(\beta) < \pi^*(\beta)$ , contradicting the hypothesis  $\pi^c(\beta) \geq \pi^*(\beta)$ .

Therefore, the assumption  $p^*(\beta) \geq p^c(\beta)$  is false, i.e.,  $p^*(\beta) < p^c(\beta)$ , proving the theorem ■

## Appendix J. Proof of Theorem 9

**Theorem 9.** *Suppose that assumptions **A4**, **A5** and **A6** are true. If the relationship*

$$\frac{(n-1)a}{n+aK} \geq a_0 \tag{41}$$

*is valid, then, there exists the value  $\hat{\beta} \in (0, 1)$  such that  $\pi^c(\hat{\beta}) = \pi^*(\hat{\beta})$  and  $p^*(\hat{\beta}) < p^c(\hat{\beta})$ .*

**Proof:** We see that the inequality (41) implies that

$$a > a_0, \tag{J.1}$$

since we consider  $n \geq 2$ .

Let  $\tilde{\nu}_0^* = \lim_{\beta \downarrow 0} \nu_0^*(\beta)$  and  $\tilde{\nu}^* = \lim_{\beta \downarrow 0} \nu^*(\beta)$  be the same limits introduced in (H.7) and (H.8) from the proof of Theorem 7.

From the equalities (30) and (31), we have that

$$\begin{aligned}
\tilde{\nu}_0^* - \tilde{\nu}^* &= \frac{1}{\frac{n}{\tilde{\nu}^* + a} + K} - \frac{1}{\frac{1}{(1-\beta)\tilde{\nu}_0^* + a_0} + \frac{\tilde{\nu}_0^* + a_0}{(1-\beta)\tilde{\nu}_0^* + a_0} \frac{n-1}{\tilde{\nu}^* + a} + K} \\
&> \frac{1}{\frac{n}{\tilde{\nu}^* + a} + K} - \frac{1}{\frac{1}{\tilde{\nu}_0^* + a_0} + \frac{n-1}{\tilde{\nu}^* + a} + K} \\
&= \frac{\left(\frac{1}{\tilde{\nu}_0^* + a_0} + \frac{n-1}{\tilde{\nu}^* + a} + K\right) - \left(\frac{n}{\tilde{\nu}^* + a} + K\right)}{\left(\frac{n}{\tilde{\nu}^* + a} + K\right) \left(\frac{1}{\tilde{\nu}_0^* + a_0} + \frac{n-1}{\tilde{\nu}^* + a} + K\right)} \\
&= \frac{\frac{1}{\tilde{\nu}_0^* + a_0} - \frac{1}{\tilde{\nu}^* + a}}{\left(\frac{n}{\tilde{\nu}^* + a} + K\right) \left(\frac{1}{\tilde{\nu}_0^* + a_0} + \frac{n-1}{\tilde{\nu}^* + a} + K\right)} \\
&= \frac{-(\tilde{\nu}_0^* - \tilde{\nu}^*) + (a - a_0)}{(\tilde{\nu}_0^* + a_0)(\tilde{\nu}^* + a) \left(\frac{n}{\tilde{\nu}^* + a} + K\right) \left(\frac{1}{\tilde{\nu}_0^* + a_0} + \frac{n-1}{\tilde{\nu}^* + a} + K\right)} \\
&> \frac{-(\tilde{\nu}_0^* - \tilde{\nu}^*)}{(\tilde{\nu}_0^* + a_0)(\tilde{\nu}^* + a) \left(\frac{n}{\tilde{\nu}^* + a} + K\right) \left(\frac{1}{\tilde{\nu}_0^* + a_0} + \frac{n-1}{\tilde{\nu}^* + a} + K\right)}. \tag{J.2}
\end{aligned}$$

Then,

$$\tilde{\nu}_0^* - \tilde{\nu}^* > \frac{-(\tilde{\nu}_0^* - \tilde{\nu}^*)}{(\tilde{\nu}_0^* + a_0)(\tilde{\nu}^* + a) \left(\frac{n}{\tilde{\nu}^* + a} + K\right) \left(\frac{1}{\tilde{\nu}_0^* + a_0} + \frac{n-1}{\tilde{\nu}^* + a} + K\right)}. \tag{J.3}$$

Since the denominator on the right-hand side of inequality (J.3) is strictly positive, then, inequality (J.3) can only be true if

$$\tilde{\nu}_0^* > \tilde{\nu}^*. \tag{J.4}$$

Now, substituting the value of  $p^*(\beta)$ , given by (H.3), we get

$$\begin{aligned}
\frac{p^* - b}{\nu^* + a} &= \frac{\left[ \frac{b_0 + (\nu_0^* + a_0) \frac{nb}{\nu^* + a}}{(1 - \beta)\nu_0^* + a_0} + T \right]}{\frac{1 + (\nu_0^* + a_0) \frac{n}{\nu^* + a}}{(1 - \beta)\nu_0^* + a_0} + K} - b \\
&= \frac{\left[ \frac{b_0 + (\nu_0^* + a_0) \frac{nb}{\nu^* + a}}{(1 - \beta)\nu_0^* + a_0} + T \right] - b \left[ \frac{1 + (\nu_0^* + a_0) \frac{n}{\nu^* + a}}{(1 - \beta)\nu_0^* + a_0} + K \right]}{(\nu^* + a) \left[ \frac{1 + (\nu_0^* + a_0) \frac{n}{\nu^* + a}}{(1 - \beta)\nu_0^* + a_0} + K \right]} \quad (J.5) \\
&= \frac{G(b) - \frac{b - b_0}{(1 - \beta)\nu_0^* + a_0}}{(\nu^* + a) \left[ \frac{1 + (\nu_0^* + a_0) \frac{n}{\nu^* + a}}{(1 - \beta)\nu_0^* + a_0} + K \right]} \\
&= \frac{[(1 - \beta)\nu_0^* + a_0]G(b) - (b - b_0)}{n(\nu_0^* + a_0) + (\nu^* + a) + [(1 - \beta)\nu_0^* + a_0](\nu^* + a)K} \\
&= \frac{[(1 - \beta)\nu_0^* + a_0]G(b) - (b - b_0)}{n(\nu_0^* + a_0) + \{1 + [(1 - \beta)\nu_0^* + a_0]K\}(\nu^* + a)}.
\end{aligned}$$

Substituting the relationship (J.5), in (I.1), we obtain

$$\begin{aligned}
\pi^*(\beta) &= \left( \nu^* + \frac{1}{2}a \right) \left( \frac{[(1 - \beta)\nu_0^* + a_0]G(b) - (b - b_0)}{n(\nu_0^* + a_0) + \{1 + [(1 - \beta)\nu_0^* + a_0]K\}(\nu^* + a)} \right)^2 \quad (J.6)
\end{aligned}$$

Similarly, we can find that

$$\begin{aligned}
\pi^c(\beta) &= \left( \frac{1}{K} + \frac{1}{2}a \right) \left( \frac{[(1 - \beta)\frac{1}{K} + a_0]G(b) - (b - b_0)}{n(\frac{1}{K} + a_0) + \{1 + [(1 - \beta)\frac{1}{K} + a_0]K\}(\frac{1}{K} + a)} \right)^2 \quad (J.7)
\end{aligned}$$

To prove the assertion of the theorem, first, we are going to show that

$$\pi^*(1) > \pi^c(1). \quad (J.8)$$



Here, we introduce the notation

$$\bar{\nu}_0^* = \nu_0^*(1), \quad (\text{J.9})$$

$$\bar{\nu}^* = \nu^*(1). \quad (\text{J.10})$$

By the relationships (J.6) and (J.7), proving inequality (J.8) is equivalent to proving the following relationship:

$$\begin{aligned} & \left( \bar{\nu}^* + \frac{1}{2}a \right) \left[ \frac{a_0 G(b) - (b - b_0)}{n(\bar{\nu}_0^* + a_0) + (1 + a_0 K)(\bar{\nu}^* + a)} \right]^2 \\ & > \left( \frac{1}{K} + \frac{1}{2}a \right) \left[ \frac{a_0 G(b) - (b - b_0)}{n(\frac{1}{K} + a_0) + (1 + a_0 K)(\frac{1}{K} + a)} \right]^2, \end{aligned} \quad (\text{J.11})$$

which in turn is equivalent to showing that

$$\begin{aligned} & \frac{(\bar{\nu}^* + \frac{1}{2}a)}{[n(\bar{\nu}_0^* + a_0) + (1 + a_0 K)(\bar{\nu}^* + a)]^2} \\ & > \frac{(\frac{1}{K} + \frac{1}{2}a)}{[n(\frac{1}{K} + a_0) + (1 + a_0 K)(\frac{1}{K} + a)]^2}. \end{aligned} \quad (\text{J.12})$$

Next, define the function

$$\begin{aligned} \Psi^1(t) &= \frac{[\bar{\nu}^* + t(\frac{1}{K} - \bar{\nu}^*) + \frac{1}{2}a]}{\{n[\bar{\nu}_0^* + t(\frac{1}{K} - \bar{\nu}_0^*) + a_0] + (1 + a_0 K)[\bar{\nu}^* + t(\frac{1}{K} - \bar{\nu}^*) + a]\}^2} \\ &= \frac{P_1(t)}{P_2(t)^2}, \end{aligned} \quad (\text{J.13})$$

where

$$P_1(t) = \bar{\nu}^* + t \left( \frac{1}{K} - \bar{\nu}^* \right) + \frac{1}{2}a > 0, \quad (\text{J.14})$$

$$\begin{aligned} P_2(t) &= n \left[ \bar{\nu}_0^* + t \left( \frac{1}{K} - \bar{\nu}_0^* \right) + a_0 \right] \\ &+ (1 + a_0 K) \left[ \bar{\nu}^* + t \left( \frac{1}{K} - \bar{\nu}^* \right) + a \right] > 0, \end{aligned} \quad (\text{J.15})$$

so proving (J.12) is equivalent to proving

$$\Psi^1(0) > \Psi^1(1). \quad (\text{J.16})$$

We can easily see that  $P_1(t)$ ,  $P_2(t)$  and  $\Psi^1(t)$ , are differentiable for each  $t \in [0, 1]$ , and  $\Psi^{1'}(t)$  is given by

$$\Psi^{1'}(t) = \frac{P_1'(t)P_2(t)^2 - 2P_1(t)P_2(t)P_2'(t)}{P_2(t)^4} = \frac{P_1'(t)P_2(t) - 2P_1(t)P_2'(t)}{P_2(t)^3}, \quad (\text{J.17})$$

where

$$P_1'(t) = \frac{1}{K} - \bar{\nu}^* > 0, \quad (\text{J.18})$$

$$P_2(t) = n \left( \frac{1}{K} - \bar{\nu}_0^* \right) + (1 + a_0 K) \left( \frac{1}{K} - \bar{\nu}^* \right) > 0. \quad (\text{J.19})$$

Now, we are going to analyze the sign of  $P_1'(t)P_2(t)^2 - 2P_1(t)P_2(t)P_2'(t)$ :

$$\begin{aligned} P_1'(t)P_2(t) - 2P_1(t)P_2'(t) &= \left( \frac{1}{K} - \bar{\nu}^* \right) \left\{ n \left[ \bar{\nu}_0^* + t \left( \frac{1}{K} - \bar{\nu}_0^* \right) + a_0 \right] \right. \\ &\quad \left. + (1 + a_0 K) \left[ \bar{\nu}^* + t \left( \frac{1}{K} - \bar{\nu}^* \right) + a \right] \right\} \\ &\quad - 2 \left[ \bar{\nu}^* + t \left( \frac{1}{K} - \bar{\nu}^* \right) + \frac{1}{2}a \right] \left[ n \left( \frac{1}{K} - \bar{\nu}_0^* \right) \right. \\ &\quad \left. + (1 + a_0 K) \left( \frac{1}{K} - \bar{\nu}^* \right) \right] \quad (\text{J.20}) \\ &= n \left[ (\bar{\nu}_0^* + a_0) \left( \frac{1}{K} - \bar{\nu}^* \right) - (2\bar{\nu}^* + a) \left( \frac{1}{K} - \bar{\nu}_0^* \right) \right] \\ &\quad - \bar{\nu}^* (1 + a_0 K) \left( \frac{1}{K} - \bar{\nu}^* \right) \\ &\quad - t \left( \frac{1}{K} - \bar{\nu}^* \right) \left[ n \left( \frac{1}{K} - \bar{\nu}_0^* \right) + (1 + a_0 K) \left( \frac{1}{K} - \bar{\nu}^* \right) \right]. \end{aligned}$$

Using the value of  $\bar{\nu}_0^*$  given by (30) we find the identity

$$\bar{\nu}_0^* = \frac{1}{\frac{n}{\bar{\nu}^* + a} + K} = \frac{\bar{\nu}^* + a}{n + (\bar{\nu}^* + a)K}, \quad (\text{J.21})$$

so we can define a new function  $\psi^1(\bar{\nu}^*)$  as follows:

$$\begin{aligned} &n \left[ (\bar{\nu}_0^* + a_0) \left( \frac{1}{K} - \bar{\nu}^* \right) - (2\bar{\nu}^* + a) \left( \frac{1}{K} - \bar{\nu}_0^* \right) \right] \\ &\quad - \bar{\nu}^* (1 + a_0 K) \left( \frac{1}{K} - \bar{\nu}^* \right) \\ &= n \left\{ \left[ \frac{\bar{\nu}^* + a}{n + (\bar{\nu}^* + a)K} + a_0 \right] \left( \frac{1}{K} - \bar{\nu}^* \right) \right. \\ &\quad \left. - (2\bar{\nu}^* + a) \left[ \frac{1}{K} - \frac{\bar{\nu}^* + a}{n + (\bar{\nu}^* + a)K} \right] \right\} - \bar{\nu}^* (1 + a_0 K) \left( \frac{1}{K} - \bar{\nu}^* \right) \quad (\text{J.22}) \\ &= \frac{n}{n + (\bar{\nu}^* + a)K} \left( \{ (\bar{\nu}^* + a) + a_0 [n + (\bar{\nu}^* + a)K] \} \left( \frac{1}{K} - \bar{\nu}^* \right) \right. \\ &\quad \left. - (2\bar{\nu}^* + a) \left\{ \frac{1}{K} [n + (\bar{\nu}^* + a)K] - (\bar{\nu}^* + a) \right\} \right) \\ &\quad - \bar{\nu}^* (1 + a_0 K) \left( \frac{1}{K} - \bar{\nu}^* \right) = \psi^1(\bar{\nu}^*). \end{aligned}$$

Then,

$$\begin{aligned}
& [n + (\bar{\nu}^* + a)K]\psi^1(\bar{\nu}^*) \\
&= n \left( \{(\bar{\nu}^* + a) + a_0[n + (\bar{\nu}^* + a)K]\} \left( \frac{1}{K} - \bar{\nu}^* \right) \right. \\
&\quad \left. - (2\bar{\nu}^* + a) \left\{ \frac{1}{K}[n + (\bar{\nu}^* + a)K] - (\bar{\nu}^* + a) \right\} \right) \\
&\quad - \bar{\nu}^*(1 + a_0K) \left( \frac{1}{K} - \bar{\nu}^* \right) [n + (\bar{\nu}^* + a)K] = n\psi_1^1(\bar{\nu}^*) + \psi_2^1(\bar{\nu}^*),
\end{aligned} \tag{J.23}$$

where

$$\begin{aligned}
\psi_1^1(\bar{\nu}^*) &= \{(\bar{\nu}^* + a) + a_0[n + (\bar{\nu}^* + a)K]\} \left( \frac{1}{K} - \bar{\nu}^* \right) \\
&\quad - (2\bar{\nu}^* + a) \left\{ \frac{1}{K}[n + (\bar{\nu}^* + a)K] - (\bar{\nu}^* + a) \right\}
\end{aligned} \tag{J.24}$$

$$\psi_2^1(\bar{\nu}^*) = -\bar{\nu}^*(1 + a_0K) \left( \frac{1}{K} - \bar{\nu}^* \right) [n + (\bar{\nu}^* + a)K] < 0. \tag{J.25}$$

We can easily see that  $\psi_1^1(\bar{\nu}^*)$  is a quadratic polynomial of  $\bar{\nu}^*$ , whose derivatives are

$$\begin{aligned}
\psi_1^{1'}(\bar{\nu}^*) &= (1 + a_0K) \left( \frac{1}{K} - \bar{\nu}^* \right) - \{(\bar{\nu}^* + a) + a_0[n + (\bar{\nu}^* + a)K]\} \\
&\quad - 2 \left\{ \frac{1}{K}[n + (\bar{\nu}^* + a)K] - (\bar{\nu}^* + a) \right\}
\end{aligned} \tag{J.26}$$

$$\psi_1^{1''}(\bar{\nu}^*) = -2(1 + a_0K). \tag{J.27}$$

Making use of the Taylor series, we obtain

$$\begin{aligned}
\psi_1^1(\bar{\nu}^*) &= \psi_1^1(0) + \psi_1^{1'}(0)\bar{\nu}^* + \frac{1}{2}\psi_1^{1''}(0)\bar{\nu}^{*2} \\
&= \frac{1}{K}[a_0(n + aK) - (n - 1)a] \\
&\quad - \left[ (2n - 1)\frac{1}{K} + (n - 1)a_0 + a(1 + a_0K) \right] \bar{\nu}^* \\
&\quad - (1 + a_0K)\bar{\nu}^{*2}.
\end{aligned} \tag{J.28}$$

Now, from the assumption (41), we have that

$$a_0(n + aK) - (n - 1)a \leq 0. \tag{J.29}$$

Then, from the inequality (J.29), the equality (J.28) implies that

$$\psi_1^1(\bar{\nu}^*) < 0. \tag{J.30}$$

Applying the inequalities (J.25) and (J.30), to identity (J.23), we get the relationship

$$[n + (\bar{\nu}^* + a)K]\psi^1(\bar{\nu}^*) = n\psi_1^1(\bar{\nu}^*) + \psi_2^1(\bar{\nu}^*) < 0. \quad (\text{J.31})$$

Moreover, since  $[n + (\bar{\nu}^* + a)K] > 0$ , it must hold that

$$\psi^1(\bar{\nu}^*) < 0, \quad (\text{J.32})$$

thus, applying inequality (J.32) to equality (J.22), proves that

$$\begin{aligned} n \left[ (\bar{\nu}_0^* + a_0) \left( \frac{1}{K} - \bar{\nu}^* \right) - (2\bar{\nu}^* + a) \left( \frac{1}{K} - \bar{\nu}_0^* \right) \right] \\ - \bar{\nu}^*(1 + a_0K) \left( \frac{1}{K} - \bar{\nu}^* \right) < 0. \end{aligned} \quad (\text{J.33})$$

Therefore, from the relationships (J.20) and (J.33) we see that

$$P_1'(t)P_2(t) - 2P_1(t)P_2'(t) < 0, \quad (\text{J.34})$$

which, together with (J.17) and (J.19), imply that

$$\Psi^{1'}(t) < 0, \quad \forall t \in [0, 1], \quad (\text{J.35})$$

so the function  $\Psi^1(t)$  is strictly decreasing for all  $t \in [0, 1]$ , then, the inequality (J.16) is valid, which finally proves (J.8).

Second, we are going to prove that

$$\lim_{\beta \downarrow 0} \pi^*(\beta) < \lim_{\beta \downarrow 0} \pi^c(\beta). \quad (\text{J.36})$$

Again, making use of equations (J.6) and (J.7), we see that proving (J.36) is equivalent to showing that

$$\begin{aligned} \left( \tilde{\nu}^* + \frac{1}{2}a \right) \left\{ \frac{(\tilde{\nu}_0^* + a_0)G(b) - (b - b_0)}{n(\tilde{\nu}_0^* + a_0) + [1 + (\tilde{\nu}_0^* + a_0)K](\tilde{\nu}^* + a)} \right\}^2 \\ < \left( \frac{1}{K} + \frac{1}{2}a \right) \left\{ \frac{(\frac{1}{K} + a_0)G(b) - (b - b_0)}{n(\frac{1}{K} + a_0) + [1 + (\frac{1}{K} + a_0)K](\frac{1}{K} + a)} \right\}^2. \end{aligned} \quad (\text{J.37})$$

Now, consider the function

$$\Psi^2(\nu_0, \nu) = \left( \nu + \frac{1}{2}a \right) \left\{ \frac{(\nu_0 + a_0)G(b) - (b - b_0)}{n(\nu_0 + a_0) + [1 + (\nu_0 + a_0)K](\nu + a)} \right\}^2, \quad (\text{J.38})$$

where  $\nu_0, \nu \in [0, \frac{1}{K}]$ , so proving (J.37) is equivalent to proving

$$\Psi^2(\tilde{\nu}_0^*, \tilde{\nu}^*) < \Psi^2\left(\frac{1}{K}, \frac{1}{K}\right). \quad (\text{J.39})$$

It is easy to see that  $\Psi^2(\nu_0, \nu)$  is differentiable for all  $\nu_0, \nu \in [0, \frac{1}{K}]$ .

Next, define the differentiable function

$$W_0(\nu_0, \nu) = \frac{(\nu_0 + a_0)G(b) - (b - b_0)}{n(\nu_0 + a_0) + [1 + (\nu_0 + a_0)K](\nu + a)}, \quad (\text{J.40})$$

which, due to inequality (H.16), satisfies

$$W_0(\nu_0, \nu) > 0. \quad (\text{J.41})$$

Using equation (J.40), we can rewrite the expression of  $\Psi^2(\nu_0, \nu)$ , given by (J.38), as follows:

$$\Psi^2(\nu_0, \nu) = \left(\nu + \frac{1}{2}a\right) [W_0(\nu_0, \nu)]^2. \quad (\text{J.42})$$

Then, by the chain rule

$$\frac{\partial \Psi^2}{\partial \nu_0} = 2 \left(\nu + \frac{1}{2}a\right) W_0(\nu_0, \nu) \frac{\partial W_0}{\partial \nu_0}, \quad (\text{J.43})$$

where

$$\begin{aligned} \frac{\partial W_0}{\partial \nu_0} &= \frac{G(b)\{n(\nu_0 + a_0) + [1 + (\nu_0 + a_0)K](\nu + a)\}}{\{n(\nu_0 + a_0) + [1 + (\nu_0 + a_0)K](\nu + a)\}^2} \\ &\quad - \frac{[(\nu_0 + a_0)G(b) - (b - b_0)][n + (\nu + a)K]}{\{n(\nu_0 + a_0) + [1 + (\nu_0 + a_0)K](\nu + a)\}^2} \\ &= \frac{G(b)(\nu + a) + (b - b_0)[n + (\nu + a)K]}{\{n(\nu_0 + a_0) + [1 + (\nu_0 + a_0)K](\nu + a)\}^2} > 0. \end{aligned} \quad (\text{J.44})$$

Applying inequalities (J.41) and (J.44) to equation (J.43) gives us the relationship

$$\frac{\partial \Psi^2}{\partial \nu_0} > 0, \quad (\text{J.45})$$

which proves that  $\Psi^2(\nu_0, \nu)$  is strictly increasing with respect to  $\nu_0 \in [0, \frac{1}{K}]$  for all  $\nu \in [0, \frac{1}{K}]$ .

In the same manner, we define the differentiable function

$$W(\nu_0, \nu) = \frac{(\nu + \frac{1}{2}a)}{\{n(\nu_0 + a_0) + [1 + (\nu_0 + a_0)K](\nu + a)\}^2} > 0, \quad (\text{J.46})$$

Using equation (J.46), we can rewrite the expression of  $\Psi^2(\nu_0, \nu)$ , given by (J.38), as follows:

$$\Psi^2(\nu_0, \nu) = [(\nu_0 + a_0)G(b) - (b - b_0)]^2 W(\nu_0, \nu). \quad (\text{J.47})$$

Again, by the chain rule

$$\frac{\partial \Psi^2}{\partial \nu} = [(\nu_0 + a_0)G(b) - (b - b_0)]^2 \frac{\partial W}{\partial \nu}, \quad (\text{J.48})$$

where

$$\begin{aligned} \frac{\partial W}{\partial \nu} &= \frac{\{n(\nu_0 + a_0) + [1 + (\nu_0 + a_0)K](\nu + a)\}^2}{\{n(\nu_0 + a_0) + [1 + (\nu_0 + a_0)K](\nu + a)\}^4} \\ &\quad - \frac{2(\nu + \frac{1}{2}a) \{n(\nu_0 + a_0) + [1 + (\nu_0 + a_0)K](\nu + a)\} [1 + (\nu_0 + a_0)K]}{\{n(\nu_0 + a_0) + [1 + (\nu_0 + a_0)K](\nu + a)\}^4} \\ &= \frac{n(\nu_0 + a_0) + [1 + (\nu_0 + a_0)K](\nu + a) - 2(\nu + \frac{1}{2}a) [1 + (\nu_0 + a_0)K]}{\{n(\nu_0 + a_0) + [1 + (\nu_0 + a_0)K](\nu + a)\}^3} \\ &= \frac{n(\nu_0 + a_0) - \nu - \nu(\nu_0 + a_0)K}{\{n(\nu_0 + a_0) + [1 + (\nu_0 + a_0)K](\nu + a)\}^3} \\ &= \frac{(\frac{1}{K} - \nu)(\nu_0 + a_0)K + (n - 1)(\nu_0 + a_0) - \nu}{\{n(\nu_0 + a_0) + [1 + (\nu_0 + a_0)K](\nu + a)\}^3} \\ &> \frac{(\frac{1}{K} - \nu)(\nu_0 + a_0)K + (\nu_0 - \nu)}{\{n(\nu_0 + a_0) + [1 + (\nu_0 + a_0)K](\nu + a)\}^3}. \end{aligned} \quad (\text{J.49})$$

Then, we can see that

$$\frac{\partial W}{\partial \nu} > \frac{(\frac{1}{K} - \nu)(\nu_0 + a_0)K + (\nu_0 - \nu)}{\{n(\nu_0 + a_0) + [1 + (\nu_0 + a_0)K](\nu + a)\}^3} \geq 0, \quad \forall \nu_0 \geq \nu. \quad (\text{J.50})$$

Applying inequalities (H.16) and (J.50) to equation (J.48) gives us the relationship

$$\frac{\partial \Psi^2}{\partial \nu} > 0, \quad \forall \nu_0 \geq \nu, \quad (\text{J.51})$$

which proves that  $\Psi^2(\nu_0, \nu)$  is strictly increasing with respect to  $\nu \in [0, \nu_0]$  for all  $\nu_0 \in (0, \frac{1}{K}]$ .

Finally, from inequalities (H.13), (H.26) and (J.4), we have that  $0 < \tilde{\nu}^* < \tilde{\nu}_0^* < \frac{1}{K}$ , then, by the strictly increasing behavior of  $\Psi^2(\nu_0, \nu)$  with respect to  $\nu_0 \in (0, \frac{1}{K}]$  and  $\nu \in [0, \nu_0]$ , we can conclude that

$$\Psi^2(\tilde{\nu}_0^*, \tilde{\nu}^*) < \Psi^2\left(\frac{1}{K}, \tilde{\nu}^*\right) < \Psi^2\left(\frac{1}{K}, \frac{1}{K}\right), \quad (\text{J.52})$$

so inequality (J.39) is valid, which finally proves (J.36).

Therefore, since the functions  $\pi^*(\beta)$  and  $\pi^c(\beta)$  are continuous for all  $\beta \in (0, 1]$ , and the inequalities  $\pi^*(1) > \pi^c(1)$  and  $\lim_{\beta \downarrow 0} \pi^*(\beta) < \lim_{\beta \downarrow 0} \pi^c(\beta)$  are valid, by the Intermediate Value Theorem we can grantee the existence of a value  $\hat{\beta} \in (0, 1)$  such that  $\pi^*(\hat{\beta}) = \pi^c(\hat{\beta})$ .

Finally by Theorem 8, for this value  $\hat{\beta}$ , it must hold that  $p^*(\hat{\beta}) < p^c(\hat{\beta})$ , which finishes the proof ■
